# Supplementary material
Source: MDPI journal article supplement (https://www.mdpi.com/2624-781X/3/2/22)
Supplement: s1 [file s1]

# Supplementary Material

## C-N, C-O and C-S Ullmann-Type Coupling Reactions of Arenediazonium *o*-Benzenedisulfonimides

Achille Antenucci and Stefano Dughera \*

Dipartimento di Chimica dell'Università di Torino, Via Pietro Giuria 7, 10125 Torino, Italy; achille.antenucci@unito.it

\* Correspondence: stefano.dughera@unito.it; Tel.: +39-011-6707823

|                                              |         |
|----------------------------------------------|---------|
| Physical and NMR data of anilines <b>3</b>   | Page 1  |
| References                                   | Page 2  |
| NMR spectra of anilines <b>3</b>             | Page 2  |
| Physical and NMR data of ethers <b>7</b>     | Page 12 |
| NMR spectra of ethers <b>7</b>               | Page 13 |
| Physical and NMR data of thioethers <b>8</b> | Page 19 |
| NMR spectra of thioethers <b>8</b>           | Page 19 |

### Physical and NMR data of anilines **3**

**N-(*n*-hexyl)-4-nitroaniline (3a):** 384 mg (87% yield). Yellow solid (MeOH; mp 64–65°C; Lit<sup>1</sup> mp 64–67°C). <sup>1</sup>H NMR (CDCl<sub>3</sub>, 600 MHz): 8.05 (d, 2H, *J* = 7.8 Hz), 6.80 (d, 2H, *J* = 7.8 Hz), 4.50 (br s, 1H), 3.11–3.08 (m, 2H), 1.53–1.48 (m, 2H), 1.39–1.28 (m, 6H), 0.99 (t, 3H, *J* = 6.6 Hz). <sup>13</sup>C NMR (CDCl<sub>3</sub>, 150 MHz): 157.1, 138.2, 125.3, 112.8, 44.4, 31.7, 29.3, 27.8, 22.8, 14.1. MS: *m/z* 222 (M<sup>+</sup>). IR (neat): ν<sub>NH</sub> 3386.

**N-(*n*-hexyl)-4-methoxyaniline (3b):** 330 mg (79% yield). Pale yellow oil. <sup>1</sup>H NMR (CDCl<sub>3</sub>, 600 MHz): 6.75 (d, 2H, *J* = 7.2 Hz), 6.51 (d, 2H, *J* = 7.2 Hz), 3.81 (s, 3H), 3.45 (br s 1H), 3.12 (t, 2H, *J* = 7.8 Hz), 1.56–1.52 (m, 2H), 1.40–1.31 (m, 6H), 0.99 (t, 3H, *J* = 6.6 Hz). <sup>13</sup>C NMR (CDCl<sub>3</sub>, 150 MHz): 150.9, 141.3, 115.1, 113.4, 56.0, 44.5, 31.6, 29.4, 27.7, 22.9, 14.0. MS: *m/z* 207 (M<sup>+</sup>). IR (neat): ν<sub>NH</sub> 3394.

**N-(*n*-benzyl)-4-methoxyaniline (3c):** 310 mg (73% yield). Grey solid (MeOH; mp 51–52°C; Lit<sup>2</sup> mp 48–50°C). <sup>1</sup>H NMR (CDCl<sub>3</sub>, 600 MHz): 7.30–7.20 (m, 5H), 6.76 (d, 2H, *J* = 7.2 Hz), 6.53 (d, 2H, *J* = 7.2 Hz), 4.48 (s, 2H), 3.81 (s, 3H), 3.61 (br s 1H). <sup>13</sup>C NMR (CDCl<sub>3</sub>, 150 MHz): 151.6, 140.6, 139.8, 128.4, 127.6, 126.9, 115.5, 113.5, 56.0. MS: *m/z* 213 (M<sup>+</sup>). IR (neat): ν<sub>NH</sub> 3399.

**N-(*n*-benzyl)-4-nitroaniline (3d):** 388 mg (85% yield). Yellow solid (MeOH; mp 143–144°C; Lit<sup>3</sup> mp 146–147°C). <sup>1</sup>H NMR (CDCl<sub>3</sub>, 600 MHz): 7.89 (d, 2H, *J* = 7.8 Hz), 7.29–7.21 (m, 5H), 6.80 (d, 2H, *J* = 7.8 Hz), 4.48 (s, 2H), 4.19 (br s 1H). <sup>13</sup>C NMR (CDCl<sub>3</sub>, 150 MHz): 156.4, 139.8, 138.1, 128.4, 127.6, 126.9, 125.4, 114.3, 46.9. MS: *m/z* 228 (M<sup>+</sup>). IR (neat): ν<sub>NH</sub> 3412.

**N-(*n*-hexyl)-2-nitroaniline (3e):** 228 mg (51% yield). Viscous yellow oil. <sup>1</sup>H NMR (CDCl<sub>3</sub>, 600 MHz): 8.06–8.05 (m, 1H), 7.51–7.49 (m, 1H), 6.93–6.91 (m, 1H), 6.80–6.79 (m, 1H), 3.12 (t, 2H, *J* = 5.4 Hz), 1.53–1.49 (m, 2H), 1.38–1.27 (m, 6H), 0.98 (t, 3H, *J* = 6.6 Hz). <sup>13</sup>C NMR (CDCl<sub>3</sub>, 150 MHz): 143.2, 134.1, 133.4, 127.7, 117.3, 116.2, 44.5, 31.7, 29.4, 27.6, 22.9, 14.0. MS: *m/z* 222 (M<sup>+</sup>). IR (neat): ν<sub>NH</sub> 3365.

**N-(*n*-hexyl)-3-nitroaniline (3f):** 382 mg (86% yield). Waxy solid. <sup>1</sup>H NMR (CDCl<sub>3</sub>, 600 MHz): 7.58–7.57 (m, 1H), 7.52–7.51 (m, 1H), 7.39–7.38 (m, 1H), 6.89–6.78 (m, 1H), 5.55 (br s, 1H), 3.09 (t, 2H, *J* = 7.8 Hz), 2.17 (s, 3H), 1.53–1.48 (m, 2H), 1.37–1.28 (m, 6H), 0.98 (t, 3H, *J* = 6.6 Hz). <sup>13</sup>C NMR (CDCl<sub>3</sub>, 150 MHz): 151.0, 149.0, 130.1, 117.4, 112.7, 109.2, 44.5, 31.6, 29.4, 27.7, 22.9, 14.0. MS: *m/z* 222 (M<sup>+</sup>). IR (neat): ν<sub>NH</sub> 3388.

**N-(*n*-hexyl)-2-toluidine (3g):** 175 mg (46% yield). Viscous brown oil. <sup>1</sup>H NMR (CDCl<sub>3</sub>, 600 MHz): 7.01–6.98 (m, 2H), 6.61–6.58 (m, 1H), 6.48–6.47 (m, 1H), 6.17 (s, 1H), 3.12–3.09 (m, 2H), 1.54–1.49 (m, 2H), 1.36–1.29 (m, 6H), 0.98 (t, 3H, *J* =

6.6 Hz).  $^{13}\text{C}$  NMR ( $\text{CDCl}_3$ , 150 MHz): 148.1, 129.3, 127.4, 126.7, 118.9, 114.8, 44.5, 31.6, 29.4, 27.7, 22.9, 17.3, 14.0. MS:  $m/z$  191 ( $\text{M}^+$ ). IR (neat):  $\nu_{\text{NH}}$  3374.

**N-(*n*-hexyl)-3-toluidine (3h):** 195 mg (51% yield). Viscous brown oil.  $^1\text{H}$  NMR ( $\text{CDCl}_3$ , 600 MHz): 7.09–7.05 (m, 2H), 6.53–6.51 (m, 1H), 6.42–6.41 (m, 1H), 5.53 (br s, 1H), 3.14–3.07 (m, 2H), 2.32 (s, 3H), 1.54–1.49 (m, 2H), 1.37–1.29 (m, 6H), 0.98 (t, 3H,  $J = 6.6$  Hz).  $^{13}\text{C}$  NMR ( $\text{CDCl}_3$ , 150 MHz): 147.9, 138.9, 128.9, 120.1, 115.6, 112.6, 44.5, 31.7, 29.4, 27.6, 22.9, 21.2, 14.0. MS:  $m/z$  191 ( $\text{M}^+$ ). IR (neat):  $\nu_{\text{NH}}$  3324.

**N-(*n*-hexyl)-4-iodoaniline (3i):** 520 mg (86% yield). Waxy solid.  $^1\text{H}$  NMR ( $\text{CDCl}_3$ , 600 MHz): 7.46 (d, 2H,  $J = 7.8$  Hz), 6.28 (d, 2H,  $J = 7.8$  Hz), 3.11–3.08 (m, 2H), 1.54–1.49 (m, 2H), 1.37–1.29 (m, 6H), 0.98 (t, 3H,  $J = 6.6$  Hz).  $^{13}\text{C}$  NMR ( $\text{CDCl}_3$ , 150 MHz): 148.4, 136.9, 114.9, 93.2, 44.5, 31.7, 29.4, 27.6, 22.9, 14.0. MS:  $m/z$  303 ( $\text{M}^+$ ). IR (neat):  $\nu_{\text{NH}}$  3414.

**2-[(4-Nitrophenyl)amino]ethan-1-ol (3j):** 289 mg (79% yield). Pale yellow solid (MeOH; mp 109–110 °C; Lit<sup>4</sup> mp 108 °C).  $^1\text{H}$  NMR ( $\text{CDCl}_3$ , 600 MHz): 8.05 (d, 2H,  $J = 7.8$  Hz), 6.80 (d, 2H,  $J = 7.8$  Hz), 3.60 (t, 2H,  $J = 7.2$  Hz), 3.31 (t, 2H,  $J = 7.2$  Hz),  $^{13}\text{C}$  NMR ( $\text{CDCl}_3$ , 150 MHz): 157.1, 138.3, 125.3, 112.7, 60.7, 44.8. MS:  $m/z$  182 ( $\text{M}^+$ ). IR (neat):  $\nu_{\text{NH}}$  3434,  $\nu_{\text{OH}}$  3278.

## References

1. P. Gaur, K. D. B. Yamajala, S. Banerjee, Efficient synthetic route to aromatic secondary amines via Pd/RuPhos/TBAB-catalyzed cross coupling, *New J. Chem.*, **2017**, *41*, 6523–6529. <https://doi.org/10.1039/C7NJ01095H>.
2. E. Petricci, N. Santillo, D. Castagnolo, E. Cini, M. Taddei, Iron-Catalyzed Reductive Amination of Aldehydes in Isopropyl Alcohol/Water Media as Hydrogen Sources, *Adv. Synth. Catal.* **2018**, *360*, 2560–2565. <https://doi.org/10.1002/adsc.201701619>.
3. C. Yang, F. Zhang, G.-J. Deng, H. Gong, Amination of Aromatic Halides and Exploration of the Reactivity Sequence of Aromatic Halides, *J. Org. Chem.* **2019**, *84*, 181–190. <https://doi.org/10.1021/acs.joc.8b02588>.
4. P. Lo Meo, F. D'Anna, M. Gruttadauria, S. Riela, R. Noto, Thermodynamics of binding between  $\alpha$ - and  $\beta$ -cyclodextrins and some *p*-nitroaniline derivatives: reconsidering the enthalpy–entropy compensation effect, *Tetrahedron*, **2004**, *60*, 9099–9111. <http://dx.doi.org/10.1016/j.tet.2004.07.079>.

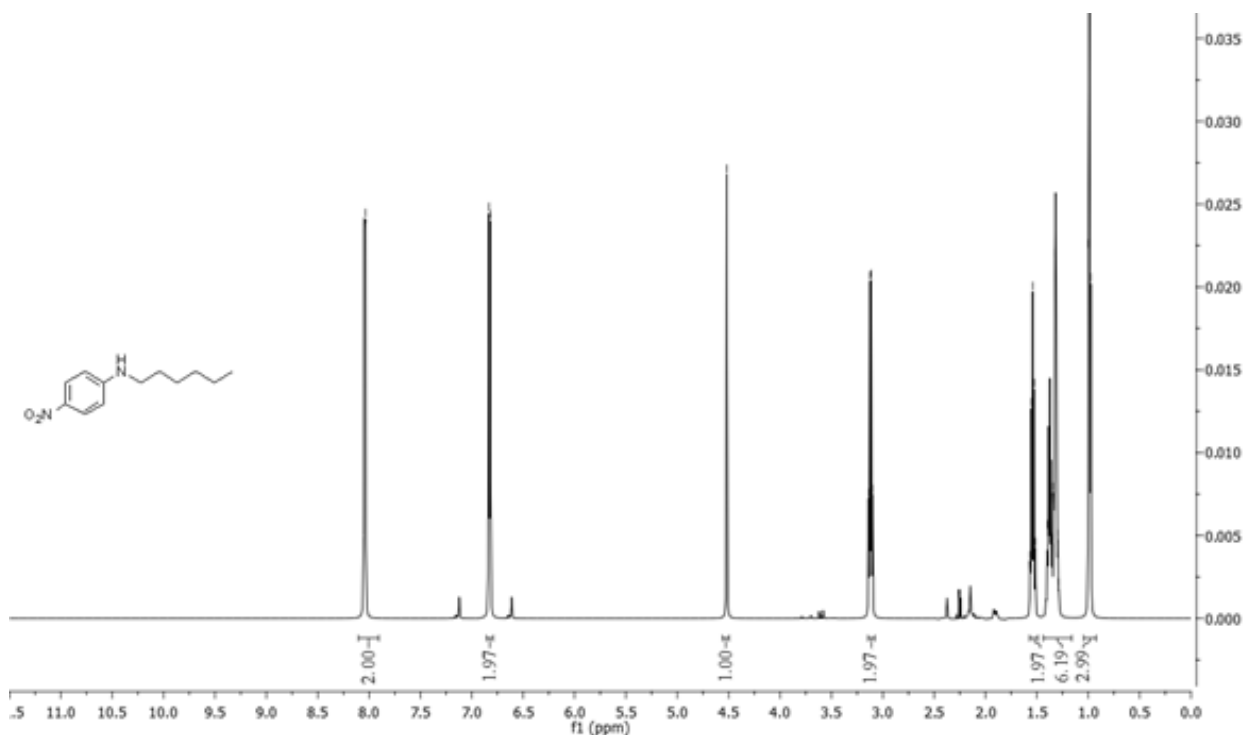

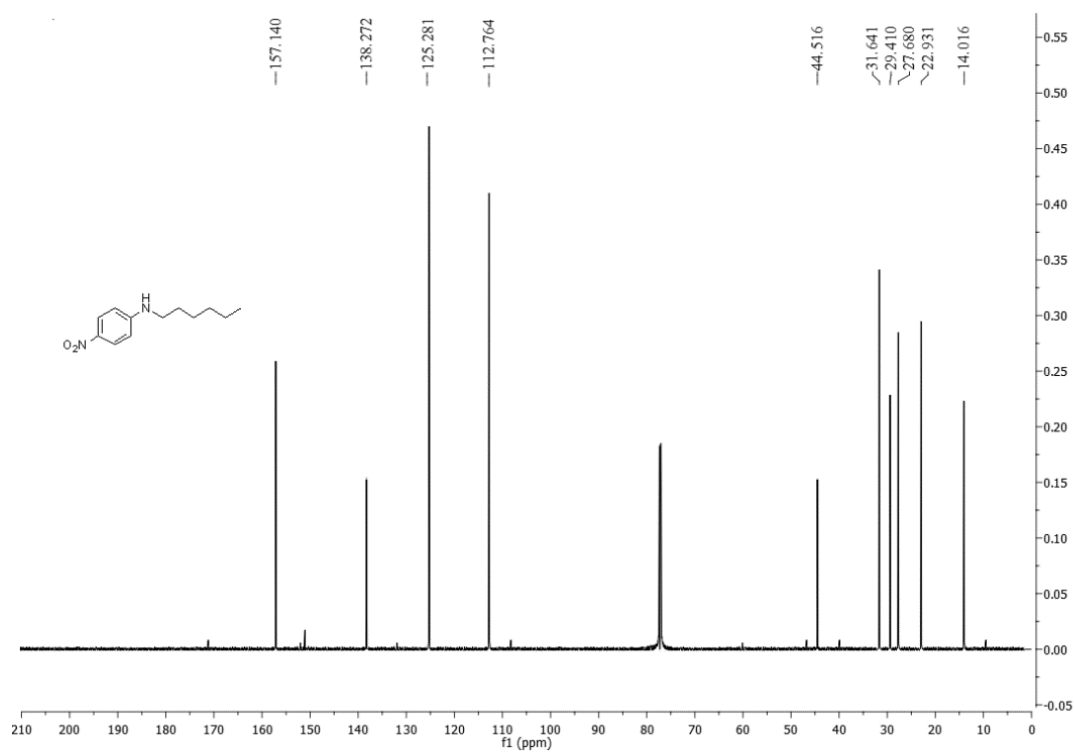

Figure S1. NMR spectra of N-(n-hexyl)-4-nitroaniline (3a).

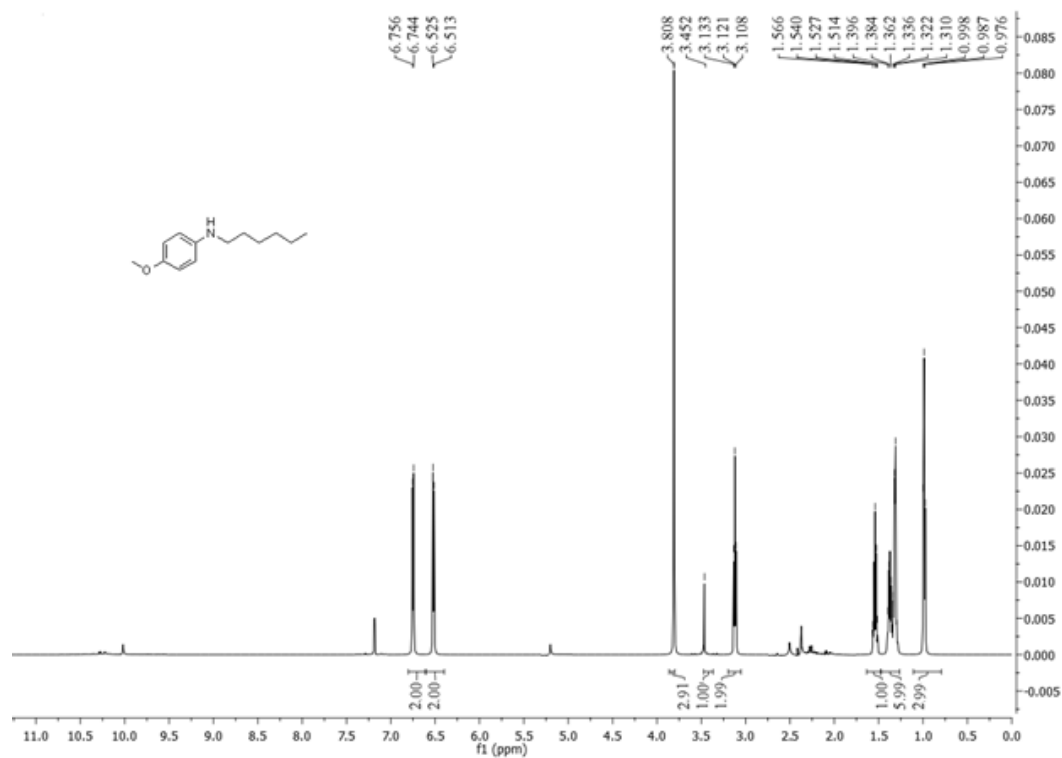

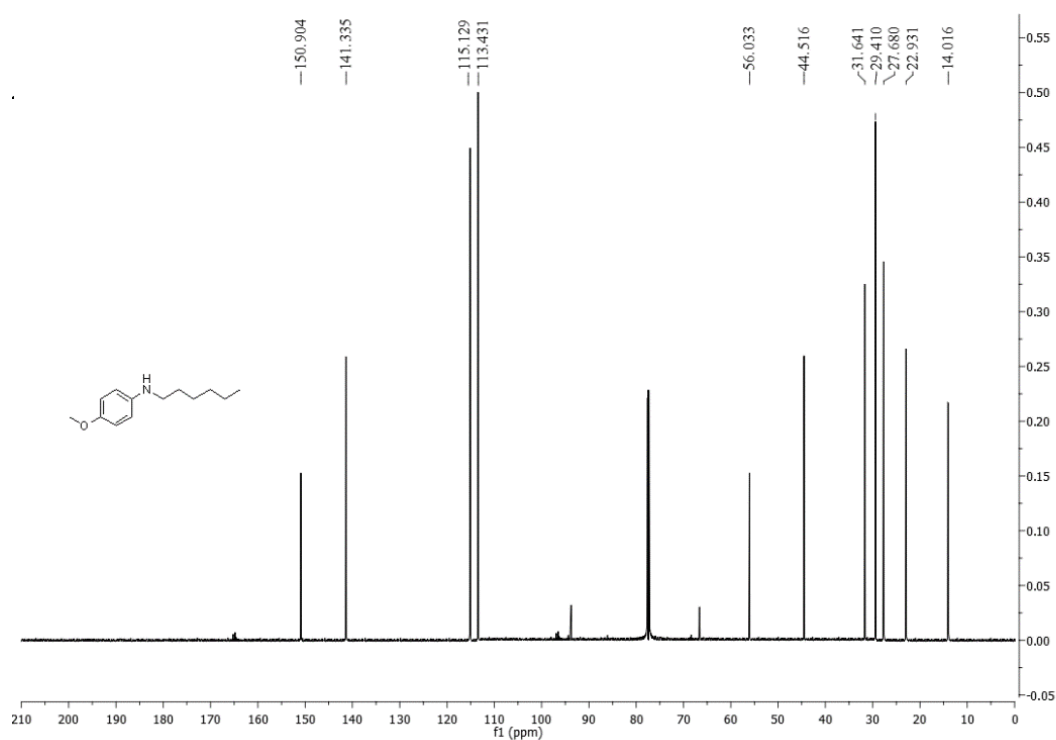

Figure S2. NMR spectra of N-(*n*-hexyl)-4-methoxyaniline (3b).

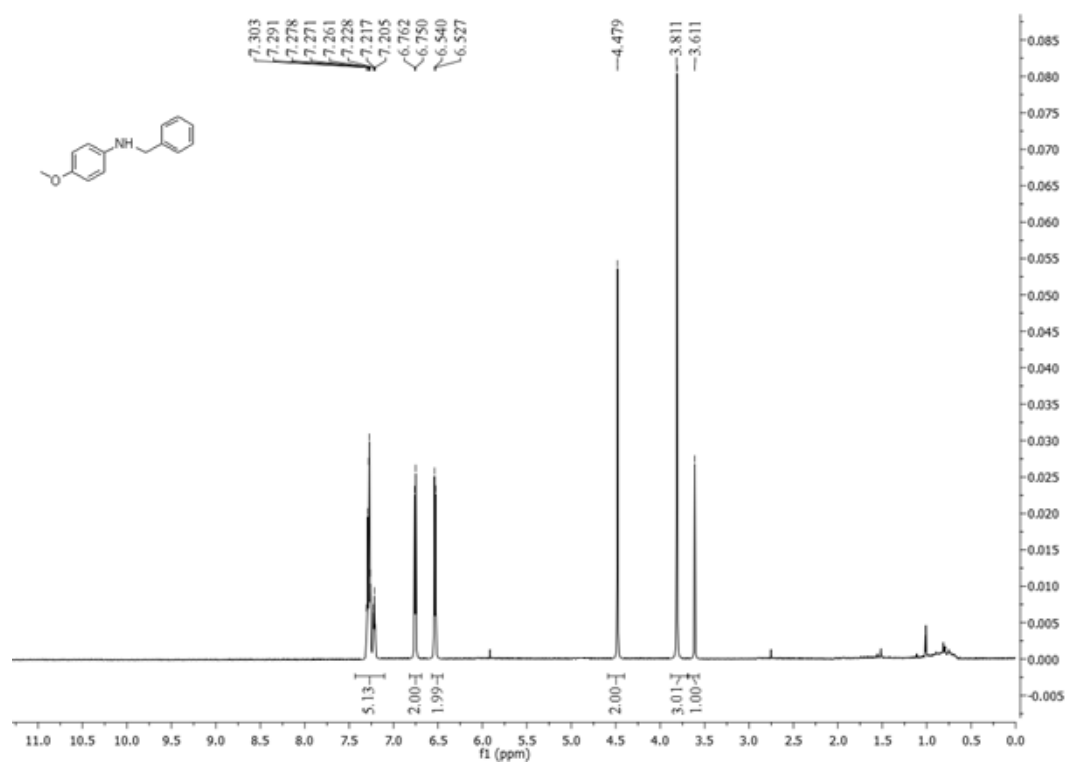

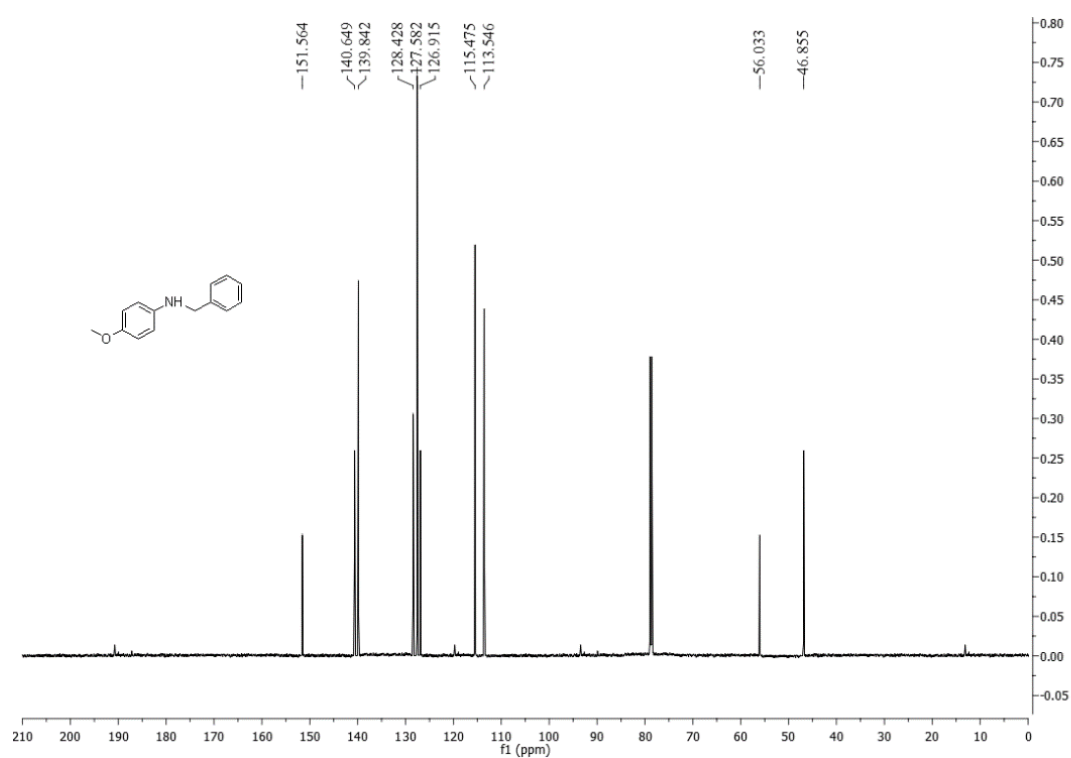

Figure S3. NMR spectra of N-(*n*-benzyl)-4-methoxyaniline (3c).

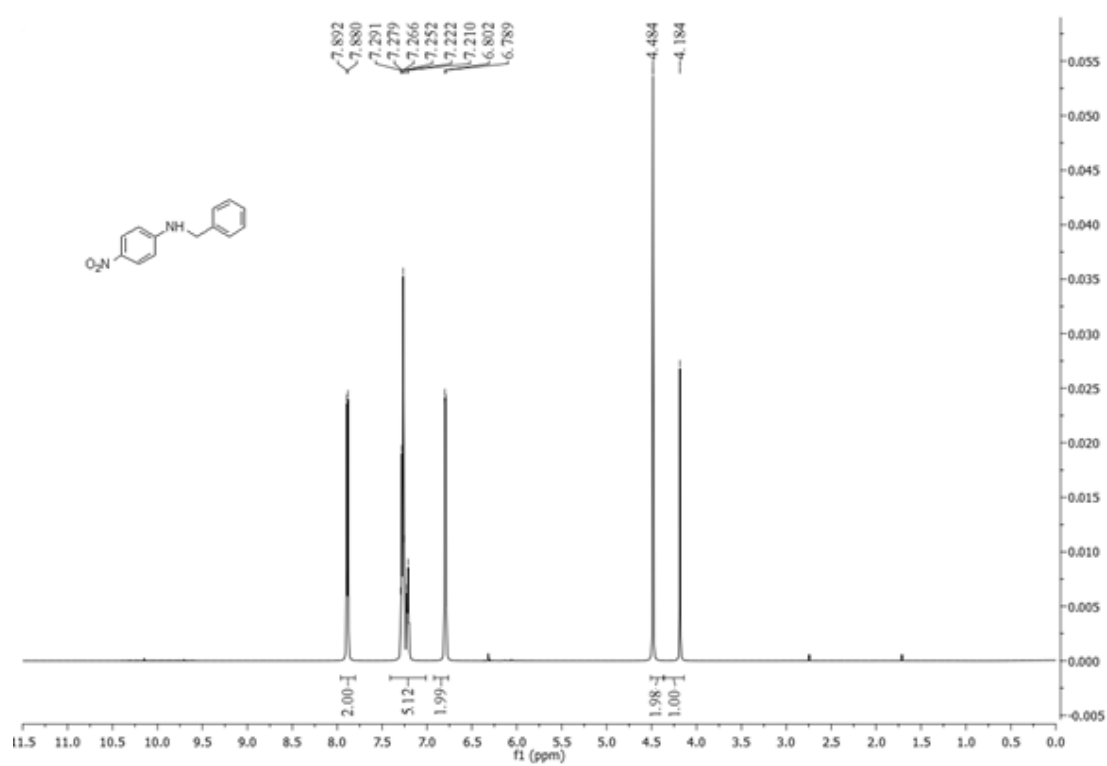

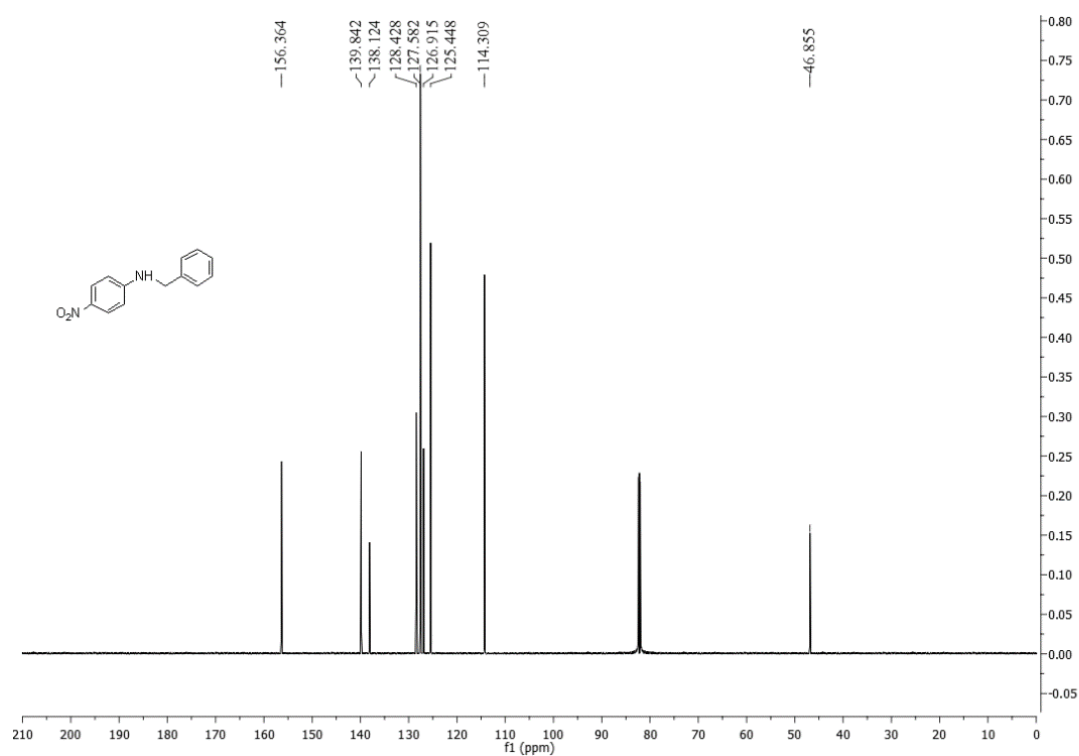

Figure S4. NMR spectra of N-(n-benzyl)-4-nitroaniline (3d).

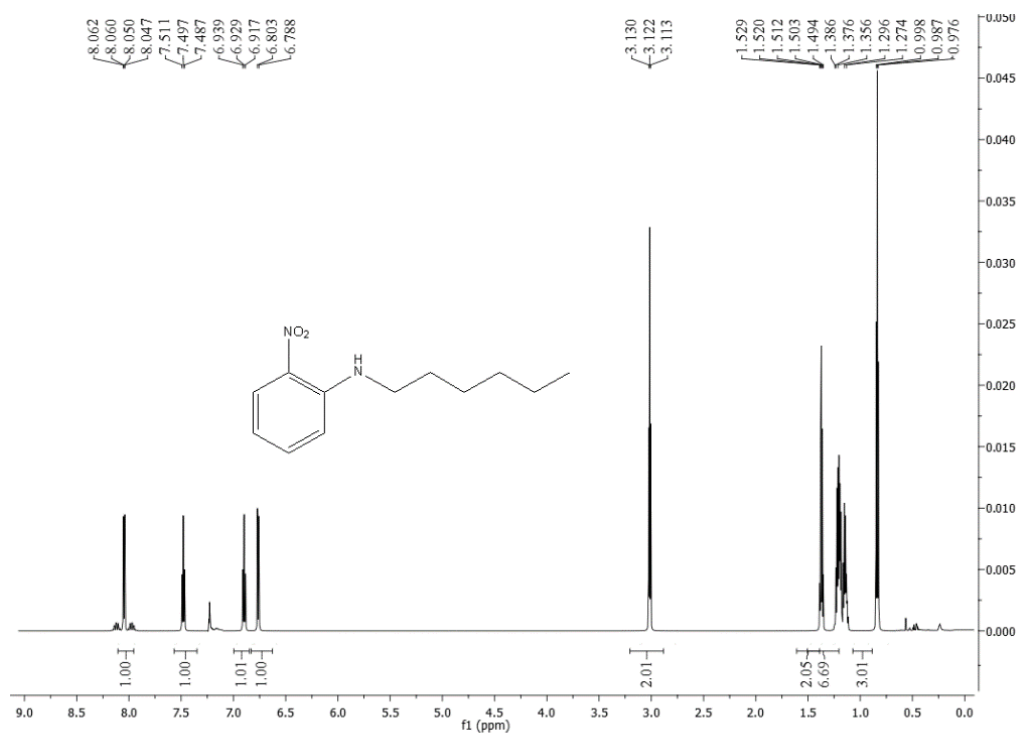

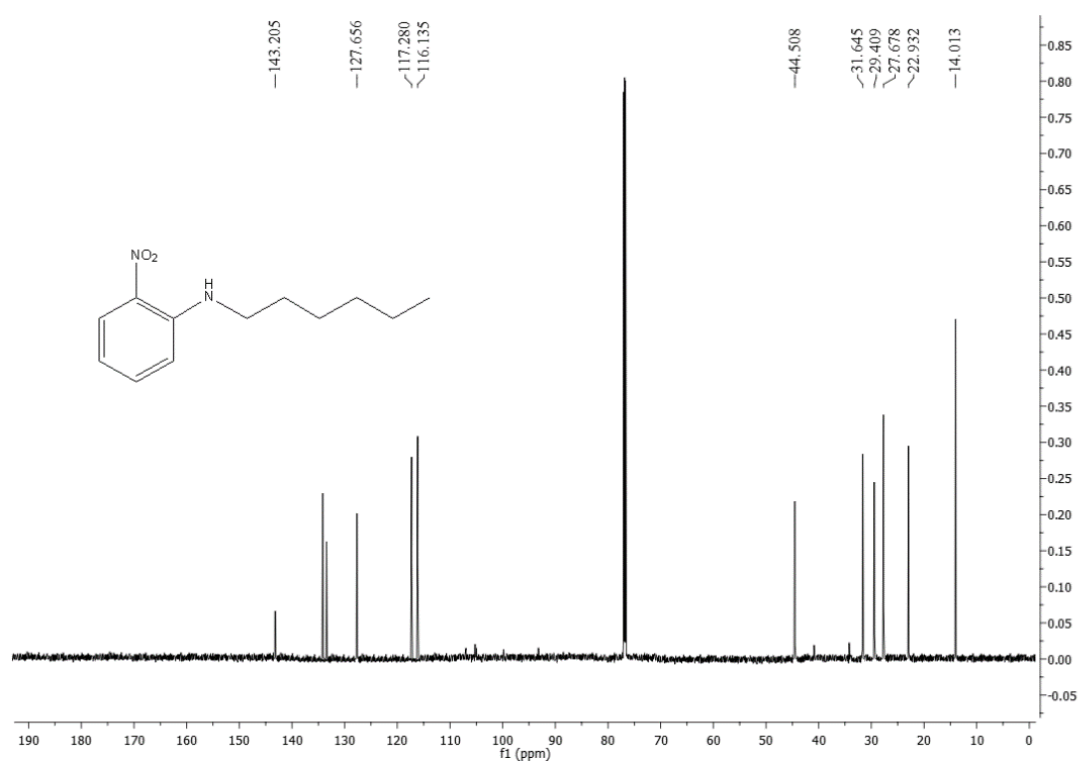

Figure S5. NMR spectra of N-(n-hexyl)-2-nitroaniline (3e).

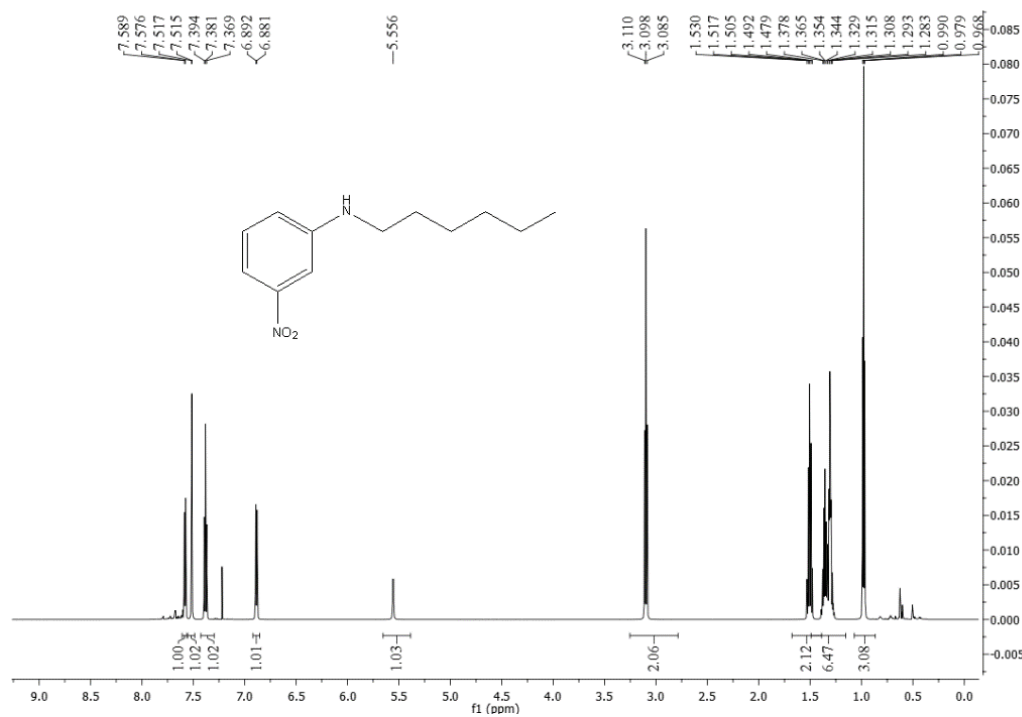

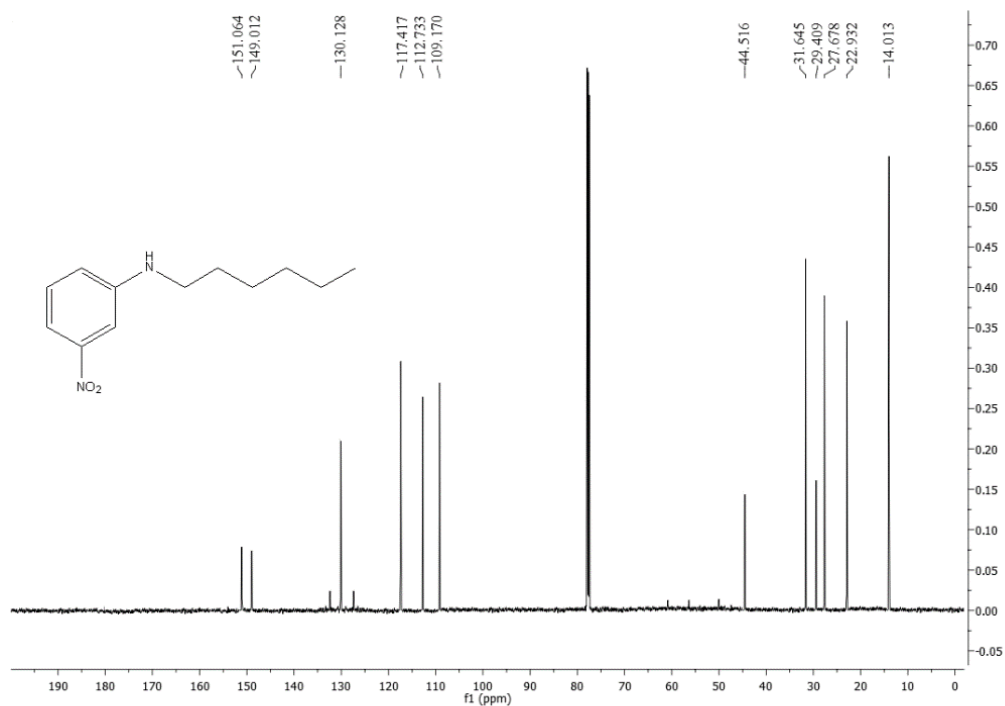

Figure S6. NMR spectra of N-(*n*-hexyl)-3-nitroaniline (3f).

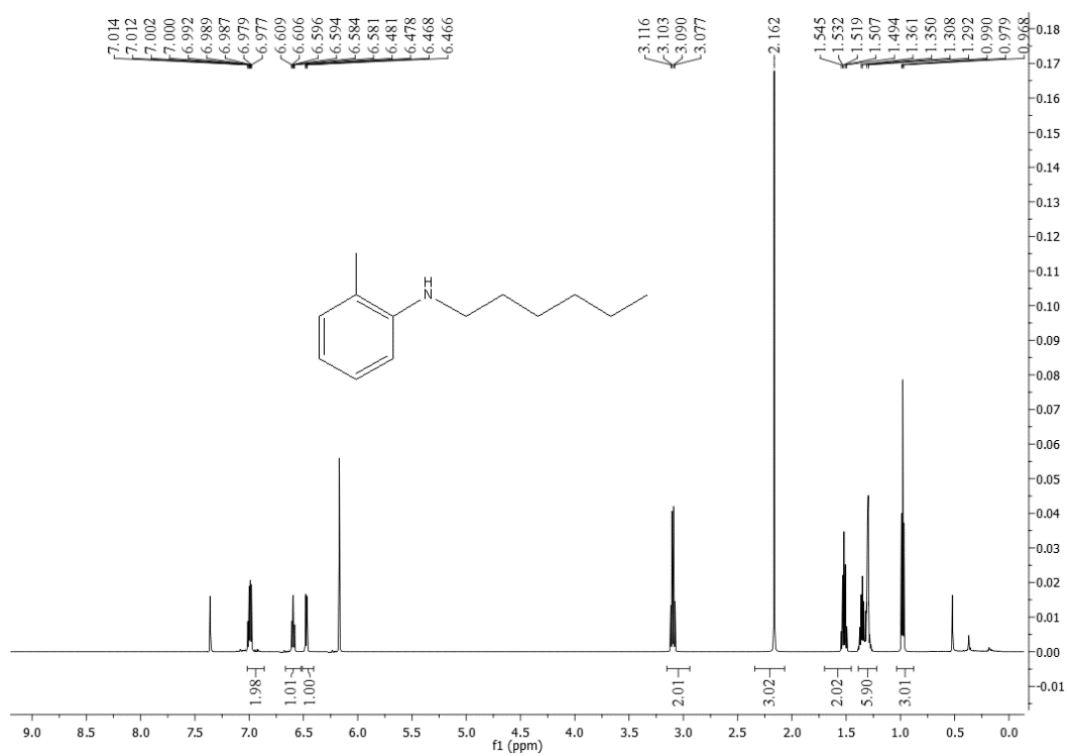



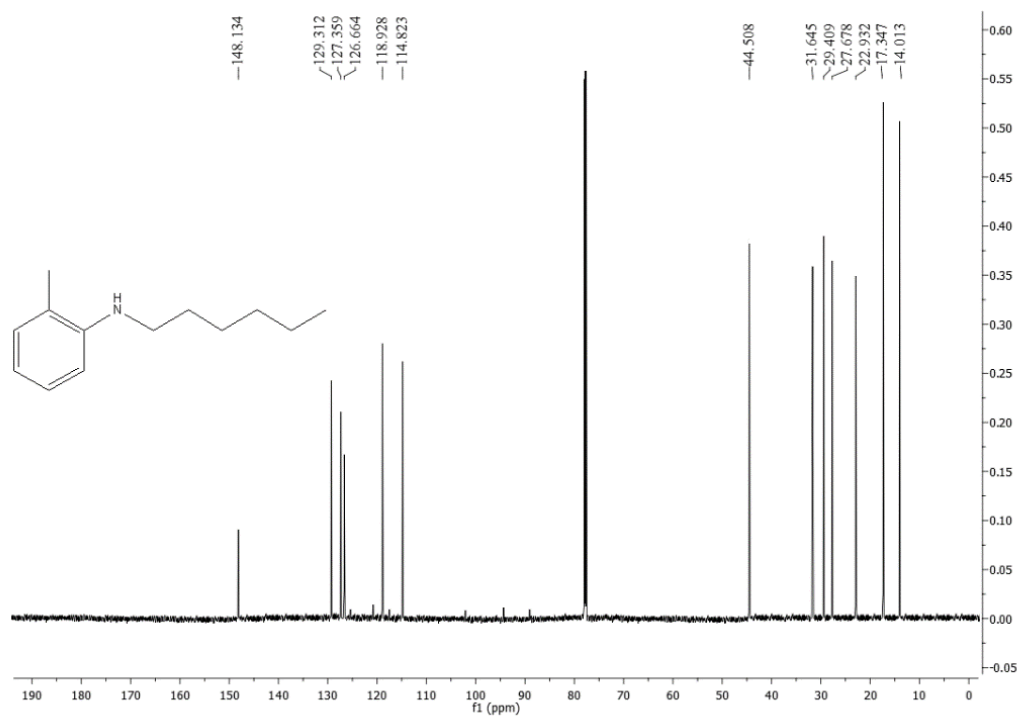

Figure S7. NMR spectra of N-(n-hexyl)-2-toluidine (3g).

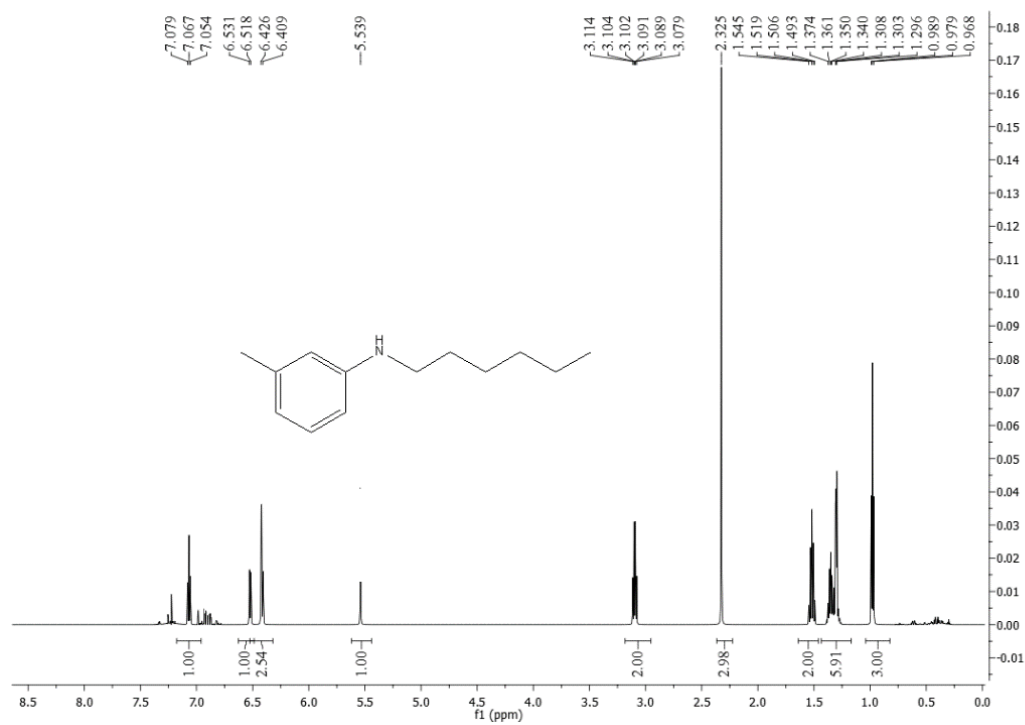

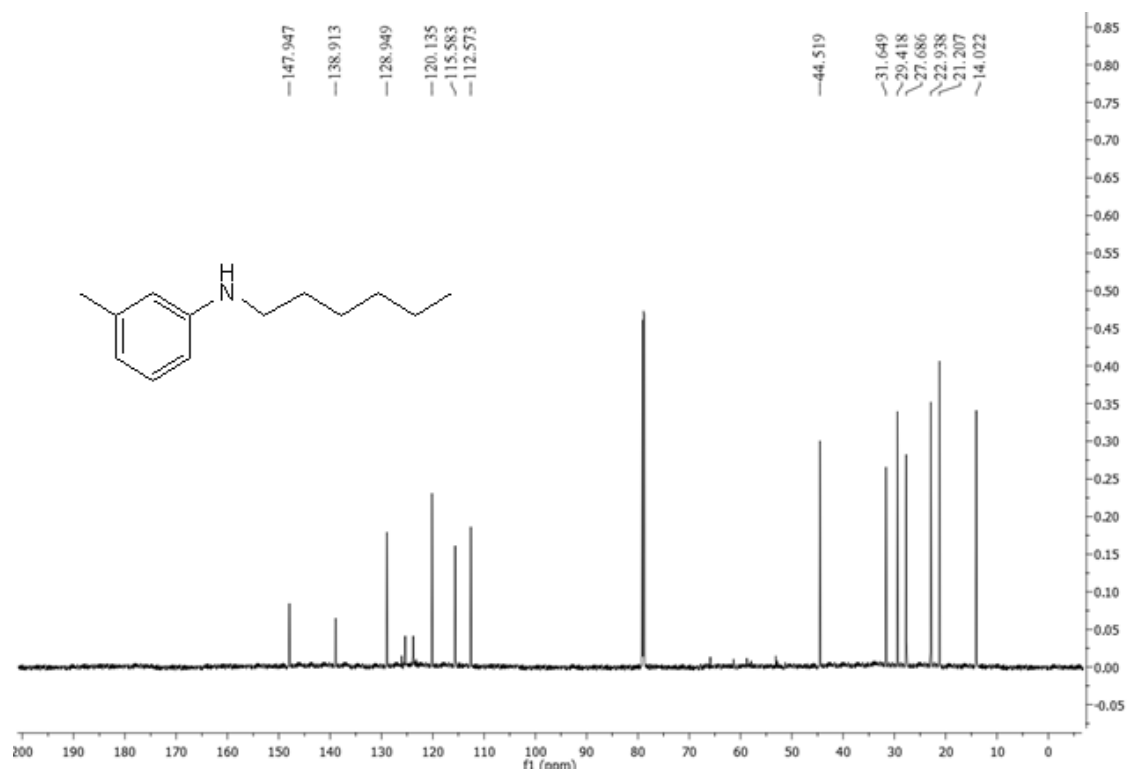

Figure S8. NMR spectra of N-(*n*-hexyl)-3-toluidine (3h).

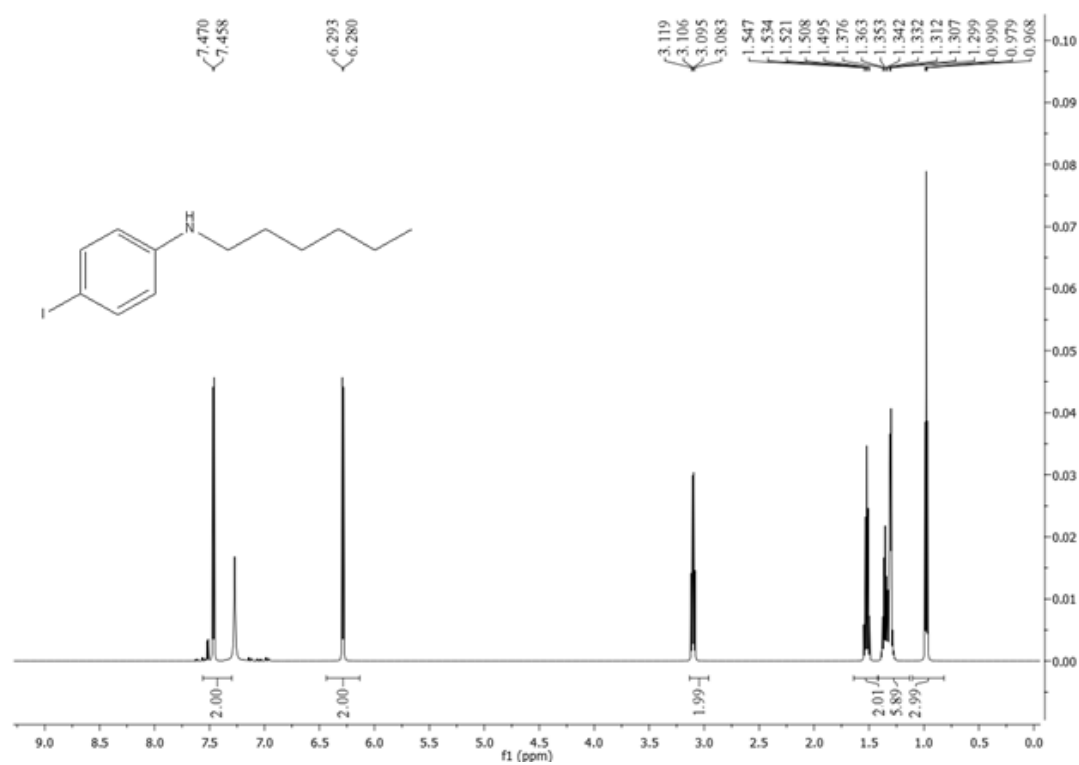

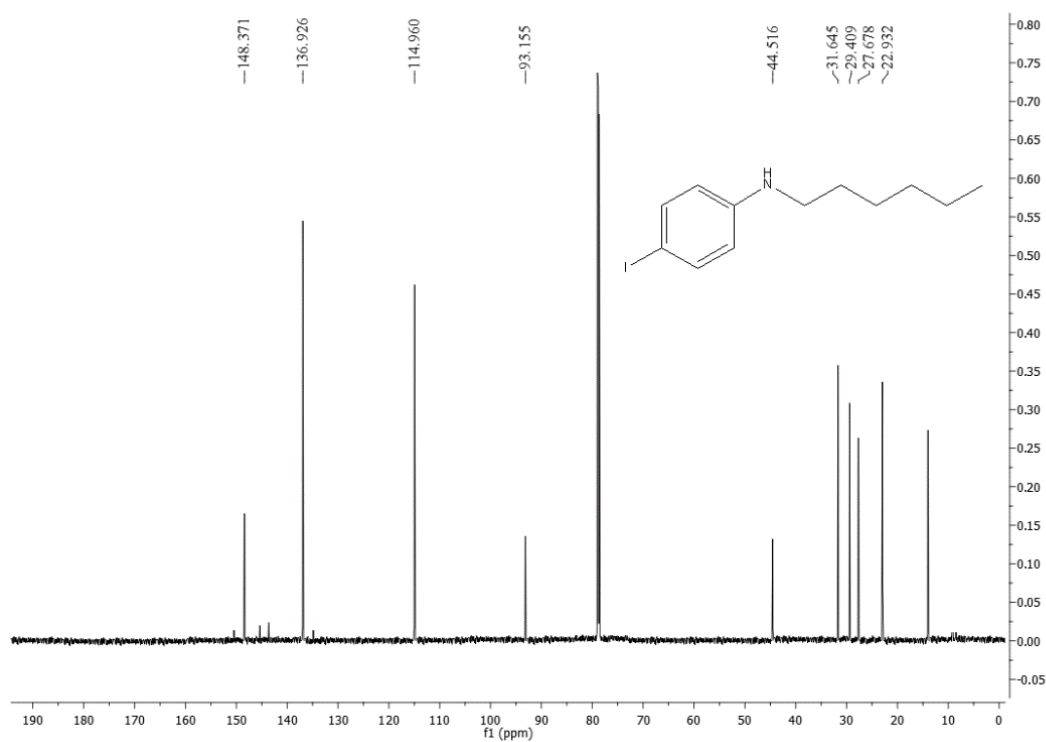

Figure S9. NMR spectra of N-(*n*-hexyl)-4-iodoaniline (3i).

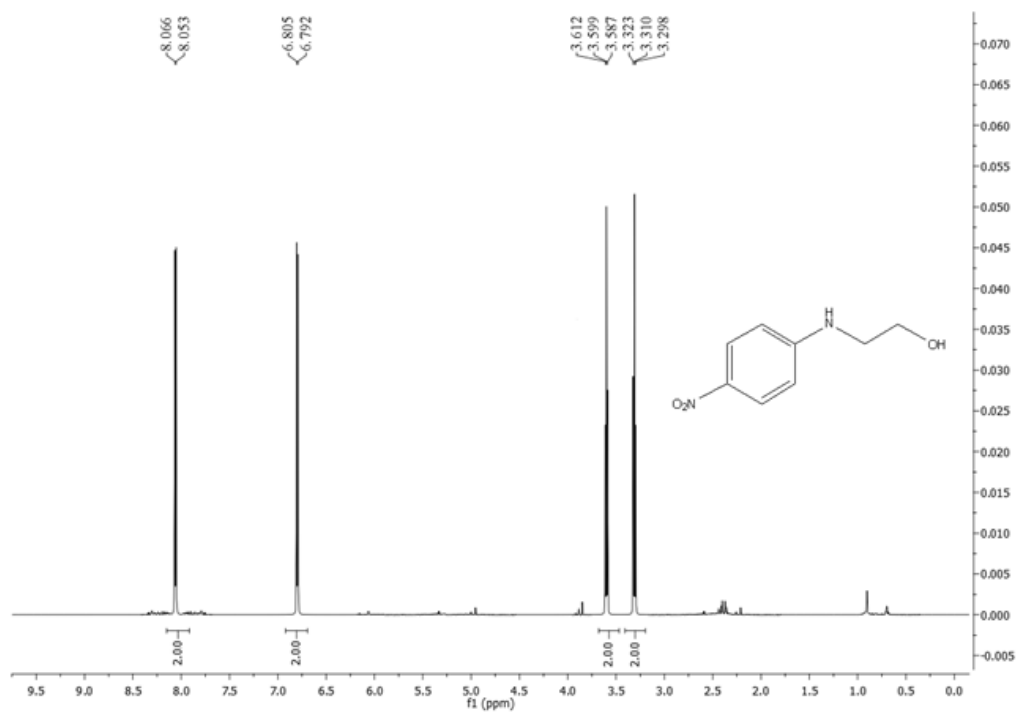

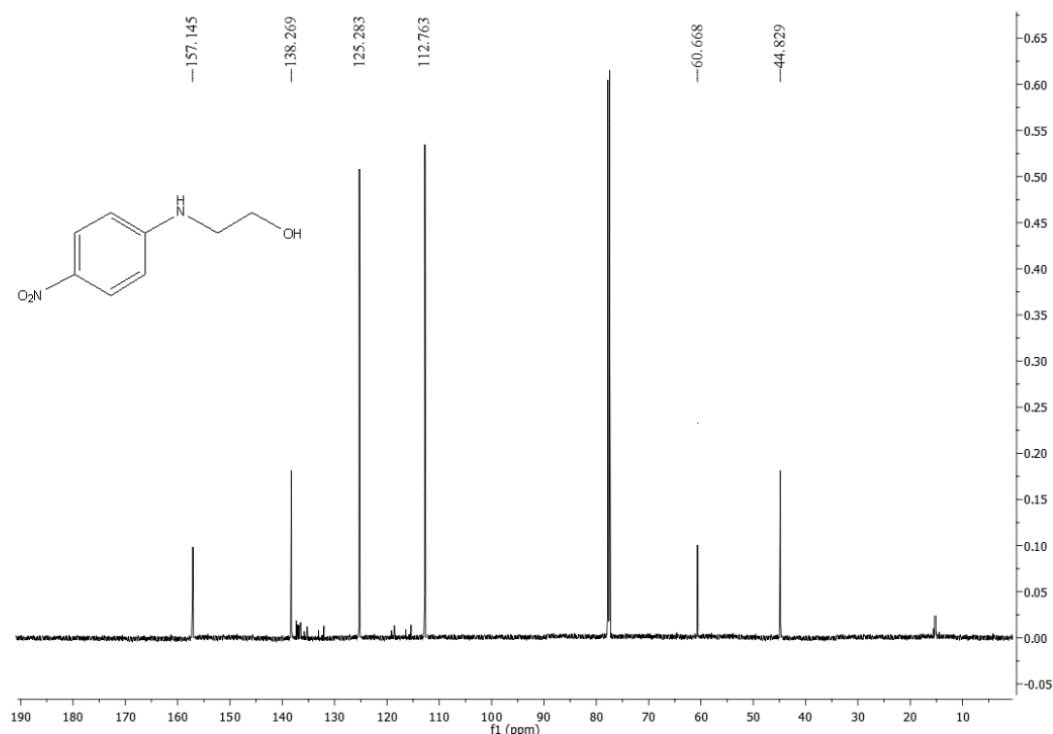

Figure S10. NMR spectra of 2-[(4-Nitrophenyl)amino]ethan-1-ol (3j).

#### Physical and NMR data of ethers 7

**1-(*n*-Hexyloxy)-4-nitrobenzene (7a):** 300 mg (67% yield). Pale red waxy solid. <sup>1</sup>H NMR (CDCl<sub>3</sub>, 600 MHz): 8.13 (d, 2H, *J* = 7.8 Hz), 7.15 (d, 2H, *J* = 7.8 Hz), 3.96 (t, 2H, *J* = 7.8 Hz), 1.76–1.71 (m, 2H), 1.36–1.29 (m, 6H), 0.99 (t, 3H, *J* = 6.6 Hz). <sup>13</sup>C NMR (CDCl<sub>3</sub>, 150 MHz): 164.0, 142.5, 127.7, 114.6, 69.6, 31.7, 28.7, 26.8, 22.9, 14.0. MS: *m/z* 223 (M<sup>+</sup>).

**1-(*n*-Hexyloxy)-4-methoxybenzene (7b):** 205 mg (49% yield). Pale yellow viscous oil. <sup>1</sup>H NMR (CDCl<sub>3</sub>, 600 MHz): 6.86 (s, 4H), 3.95 (t, 2H, *J* = 7.2 Hz), 3.81 (s, 3H), 1.76–1.71 (m, 2H), 1.39–1.29 (m, 6H), 0.99 (t, 3H, *J* = 6.6 Hz). <sup>13</sup>C NMR (CDCl<sub>3</sub>, 150 MHz): 153.9, 153.8, 116.4, 115.1, 69.6, 56.0, 31.6, 28.7, 26.8, 22.9, 14.1. MS: *m/z* 208 (M<sup>+</sup>).

**2-Ethoxynaphthalene (7c):** 231 mg (67% yield). Pale yellow oil. <sup>1</sup>H NMR (CDCl<sub>3</sub>, 600 MHz): 7.73–7.68 (m, 2H), 7.58–7.57 (m, 1H), 7.39–7.36 (m, 1H), 7.35–7.33 (m, 2H), 7.00–6.99 (m, 1H), 4.11 (q, 2H, *J* = 6.0 Hz), 1.40 (t, 3H, *J* = 6.0 Hz). <sup>13</sup>C NMR (CDCl<sub>3</sub>, 150 MHz): 157.0, 135.1, 131.1, 130.2, 128.7, 127.3, 127.2, 123.9, 115.8, 108.6, 63.8, 13.8. MS: *m/z* 172 (M<sup>+</sup>).

**2-Ethoxybenzo[*d*]thiazole (7d):** 238 mg (66% yield). Pale yellow oil. <sup>1</sup>H NMR (CDCl<sub>3</sub>, 600 MHz): 8.05–8.03 (m, 1H), 7.96–7.95 (m, 1H), 7.44–7.40 (m, 1H), 4.05 (q, 2H, *J* = 6.0 Hz), 1.39 (t, 3H, *J* = 6.0 Hz). <sup>13</sup>C NMR (CDCl<sub>3</sub>, 150 MHz): 164.4, 141.9, 133.8, 128.1, 125.1, 123.7, 120.4, 66.2, 14.7. MS: *m/z* 179 (M<sup>+</sup>).

**Methyl 3-ethoxythiophene-2-carboxylate (7e):** 189 mg (51% yield). White oil. <sup>1</sup>H NMR (CDCl<sub>3</sub>, 600 MHz): 7.36 (d, 1H, *J* = 7.2 Hz), 6.85 (d, 1H, *J* = 7.2 Hz), 4.05 (q, 2H, *J* = 6.0 Hz), 3.92 (s, 3H), 1.40 (t, 3H, *J* = 6.0 Hz). <sup>13</sup>C NMR (CDCl<sub>3</sub>, 150 MHz): 167.3, 164.9, 131.4, 119.0, 110.2, 123.7, 67.4, 52.0, 14.7. MS: *m/z* 186 (M<sup>+</sup>).

**3-Ethoxypyridine (7f):** 150 mg (60% yield). White oil. <sup>1</sup>H NMR (CDCl<sub>3</sub>, 600 MHz): 8.24–8.22 (m, 2H), 7.46 (t, 1H, *J* = 7.8 Hz), 7.36–7.35 (m, 1H), 4.02 (q, 2H, *J* = 6.0 Hz), 1.38 (t, 3H, *J* = 6.0 Hz). <sup>13</sup>C NMR (CDCl<sub>3</sub>, 150 MHz): 156.7, 143.7, 137.6, 125.7, 123.8, 63.9, 13.8. MS: *m/z* 124 (M<sup>+</sup>).

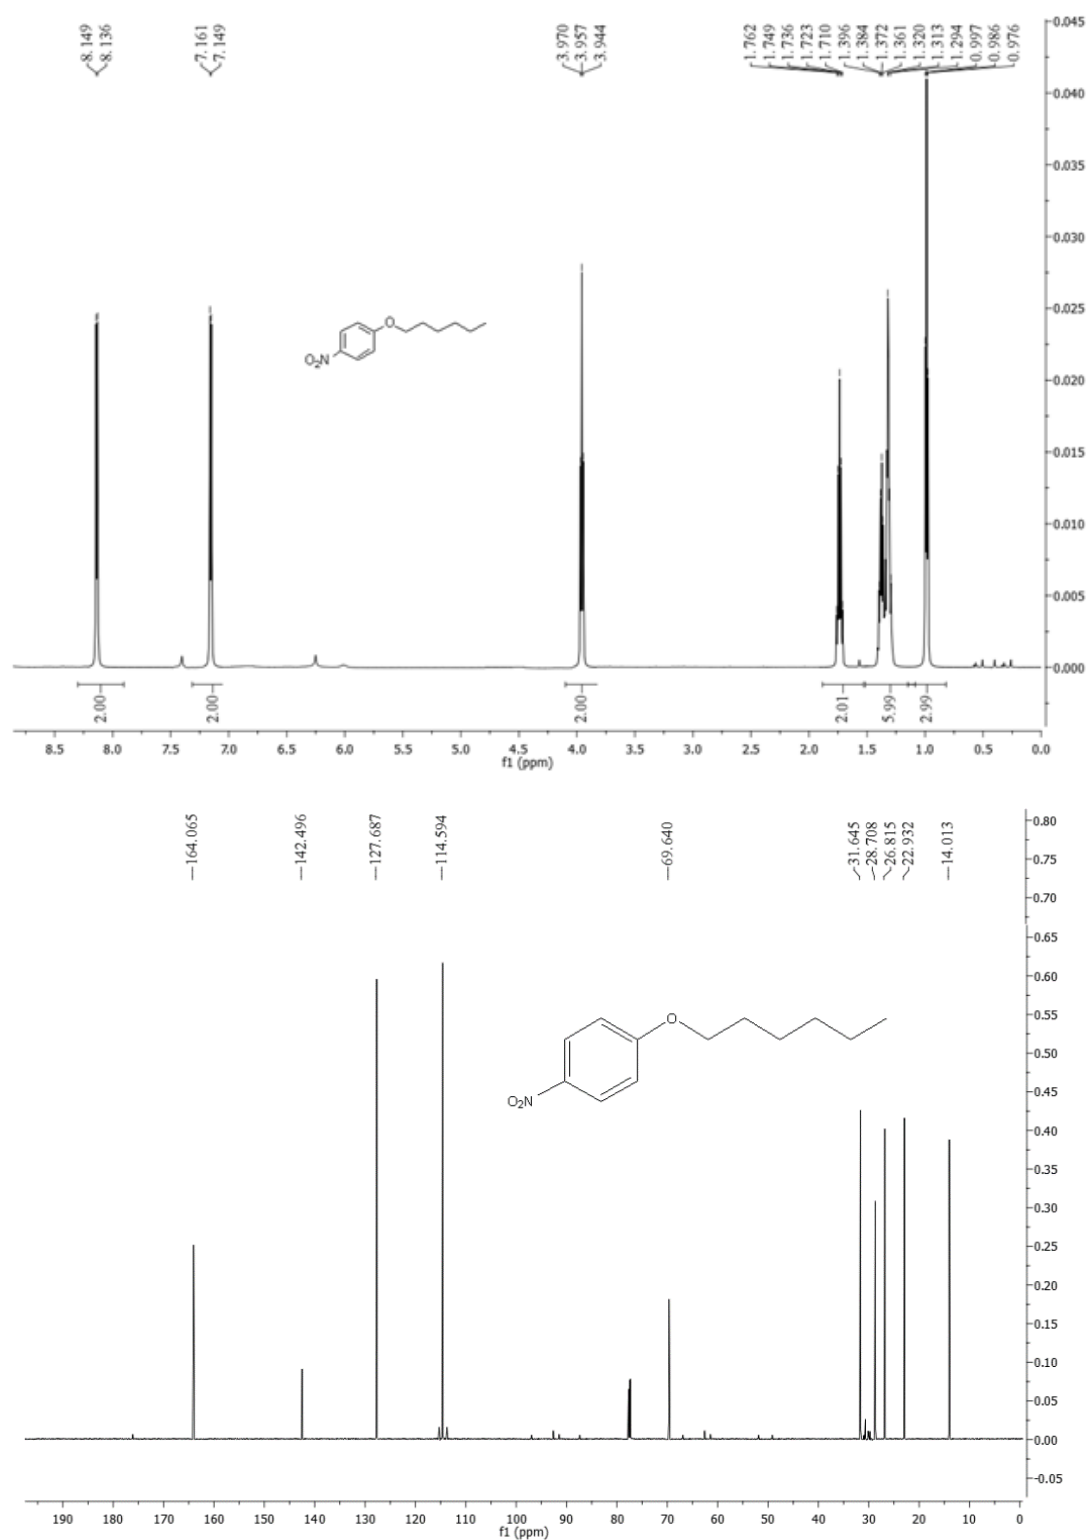

Figure S11. NMR spectra of 1-(n-Hexyloxy)-4-nitrobenzene (7a).

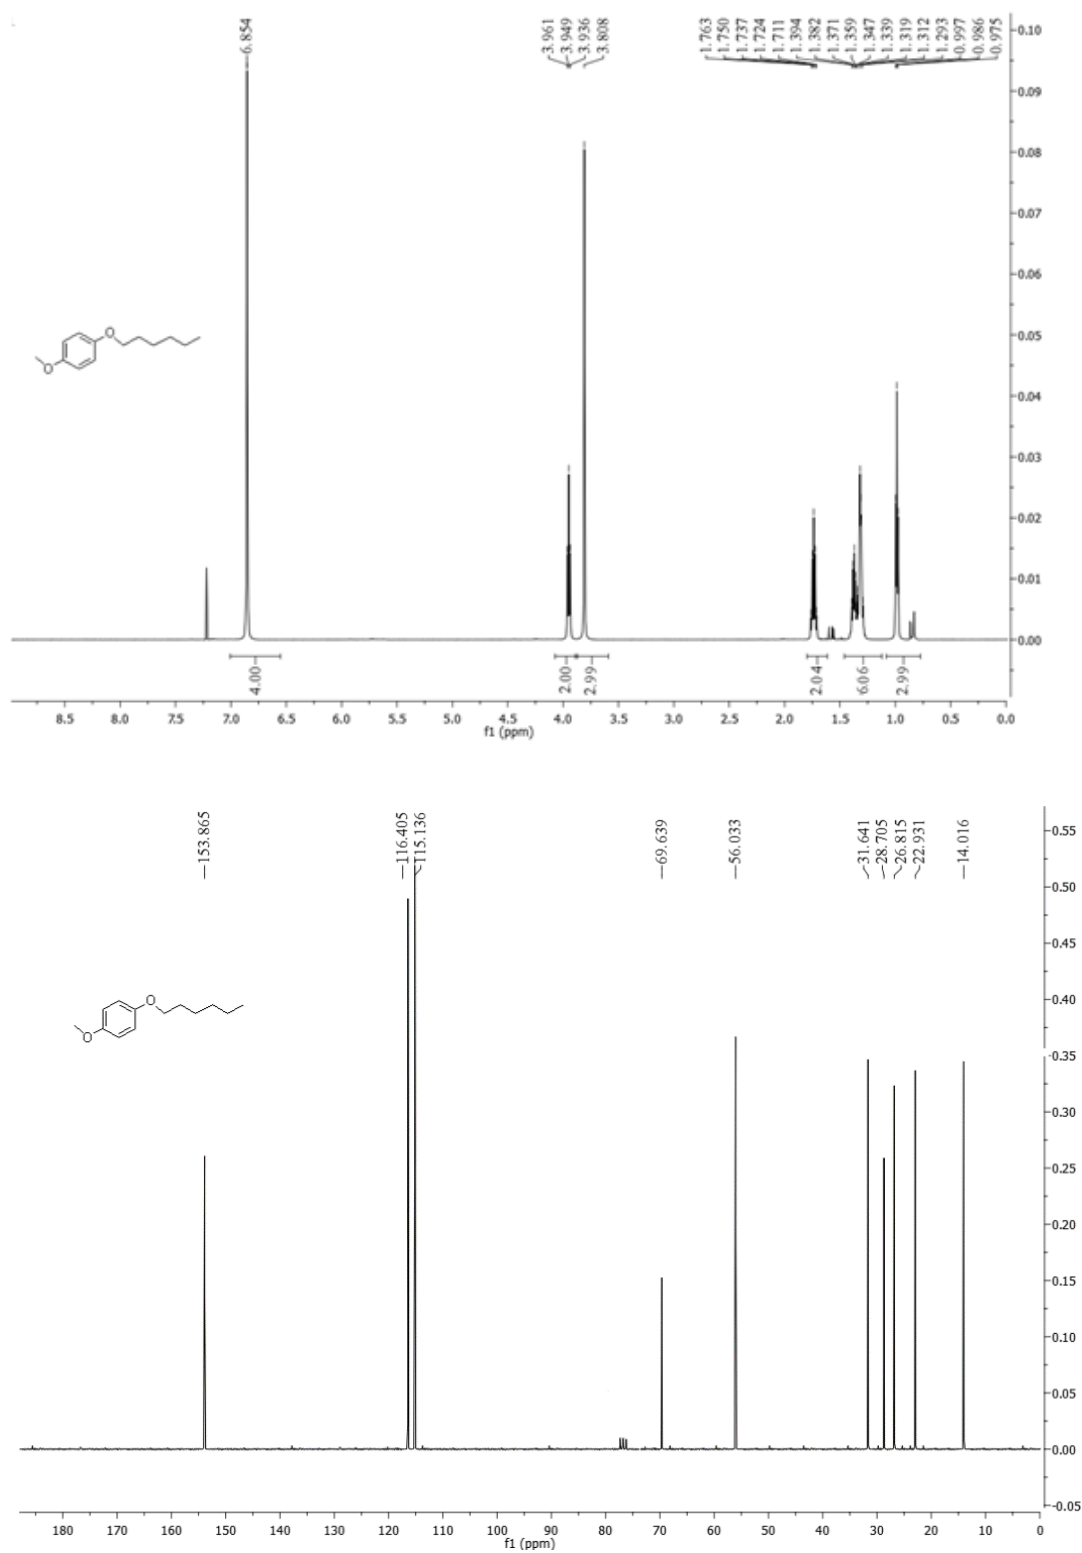

Figure S12. NMR spectra of 1-(n-Hexyloxy)-4-methoxybenzene (7b).

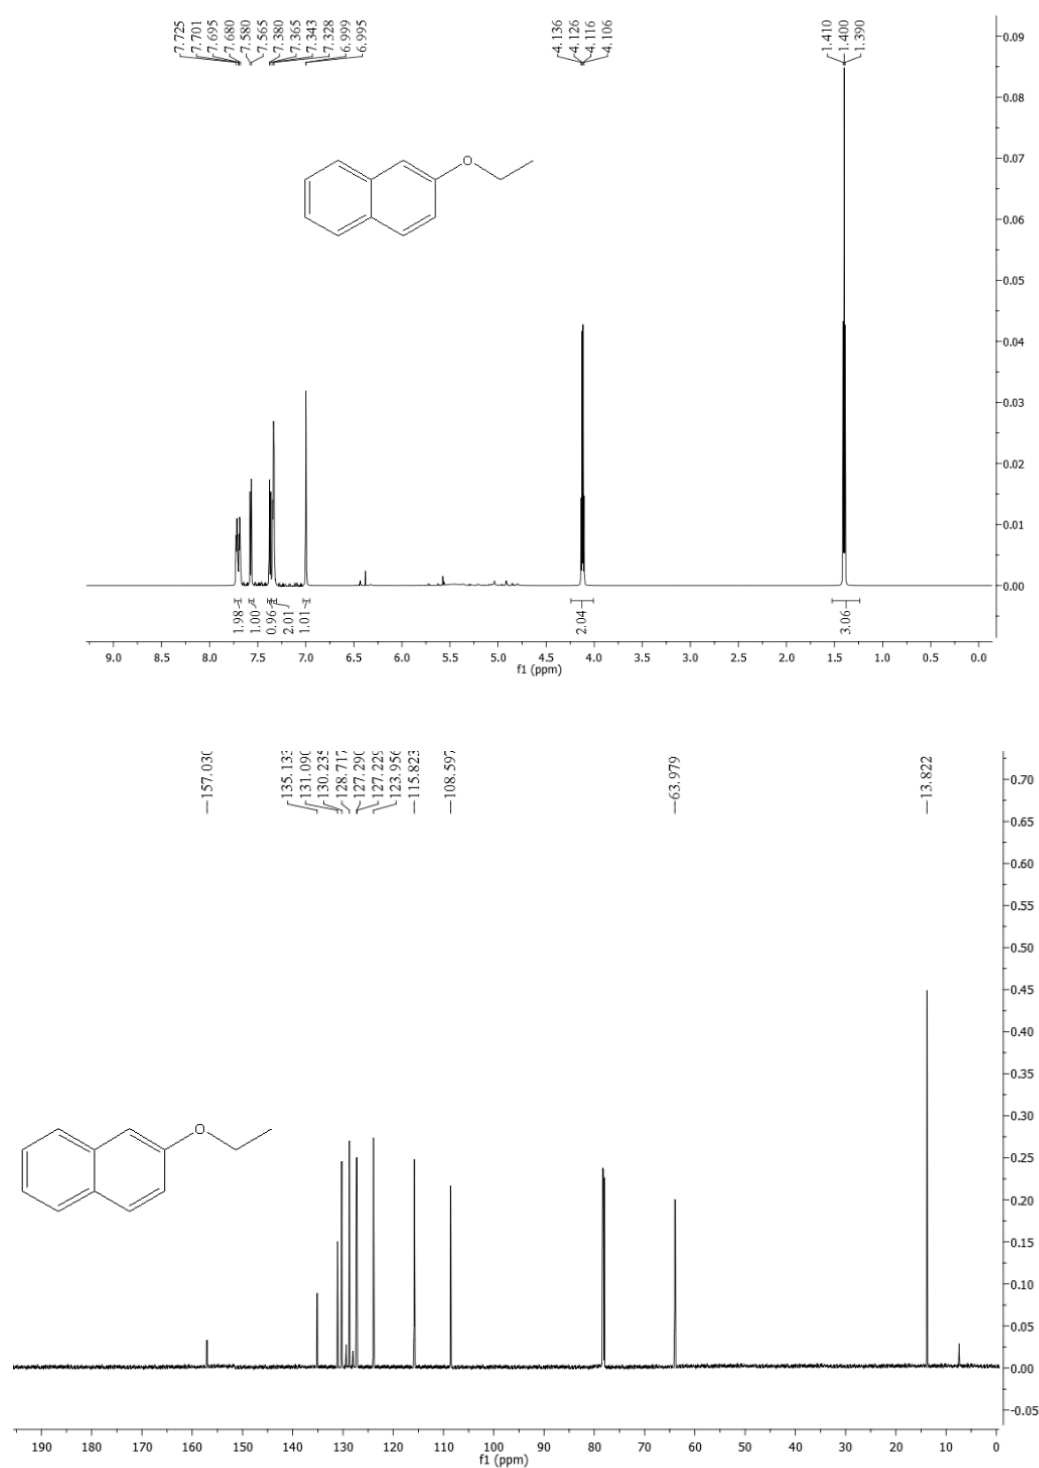

Figure S13. NMR spectra of 2-Ethoxynaphthalene (7c).

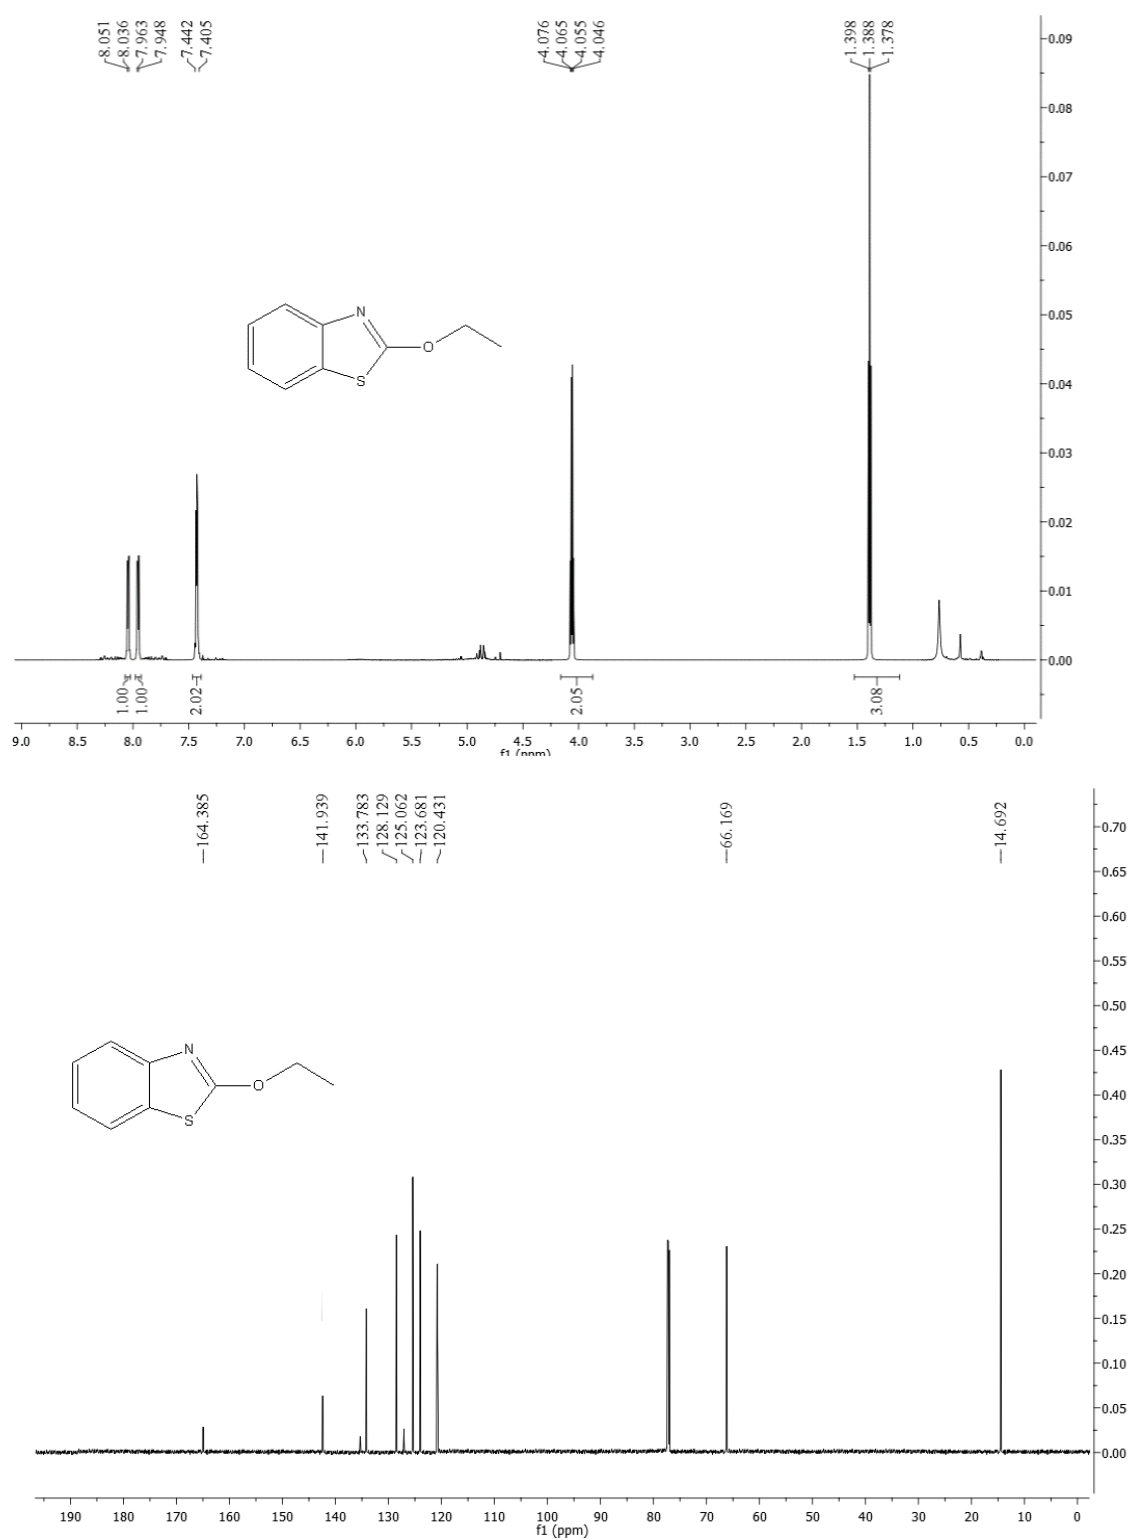

Figure S14. NMR spectra of 2-Ethoxybenzo[d]thiazole (7d).



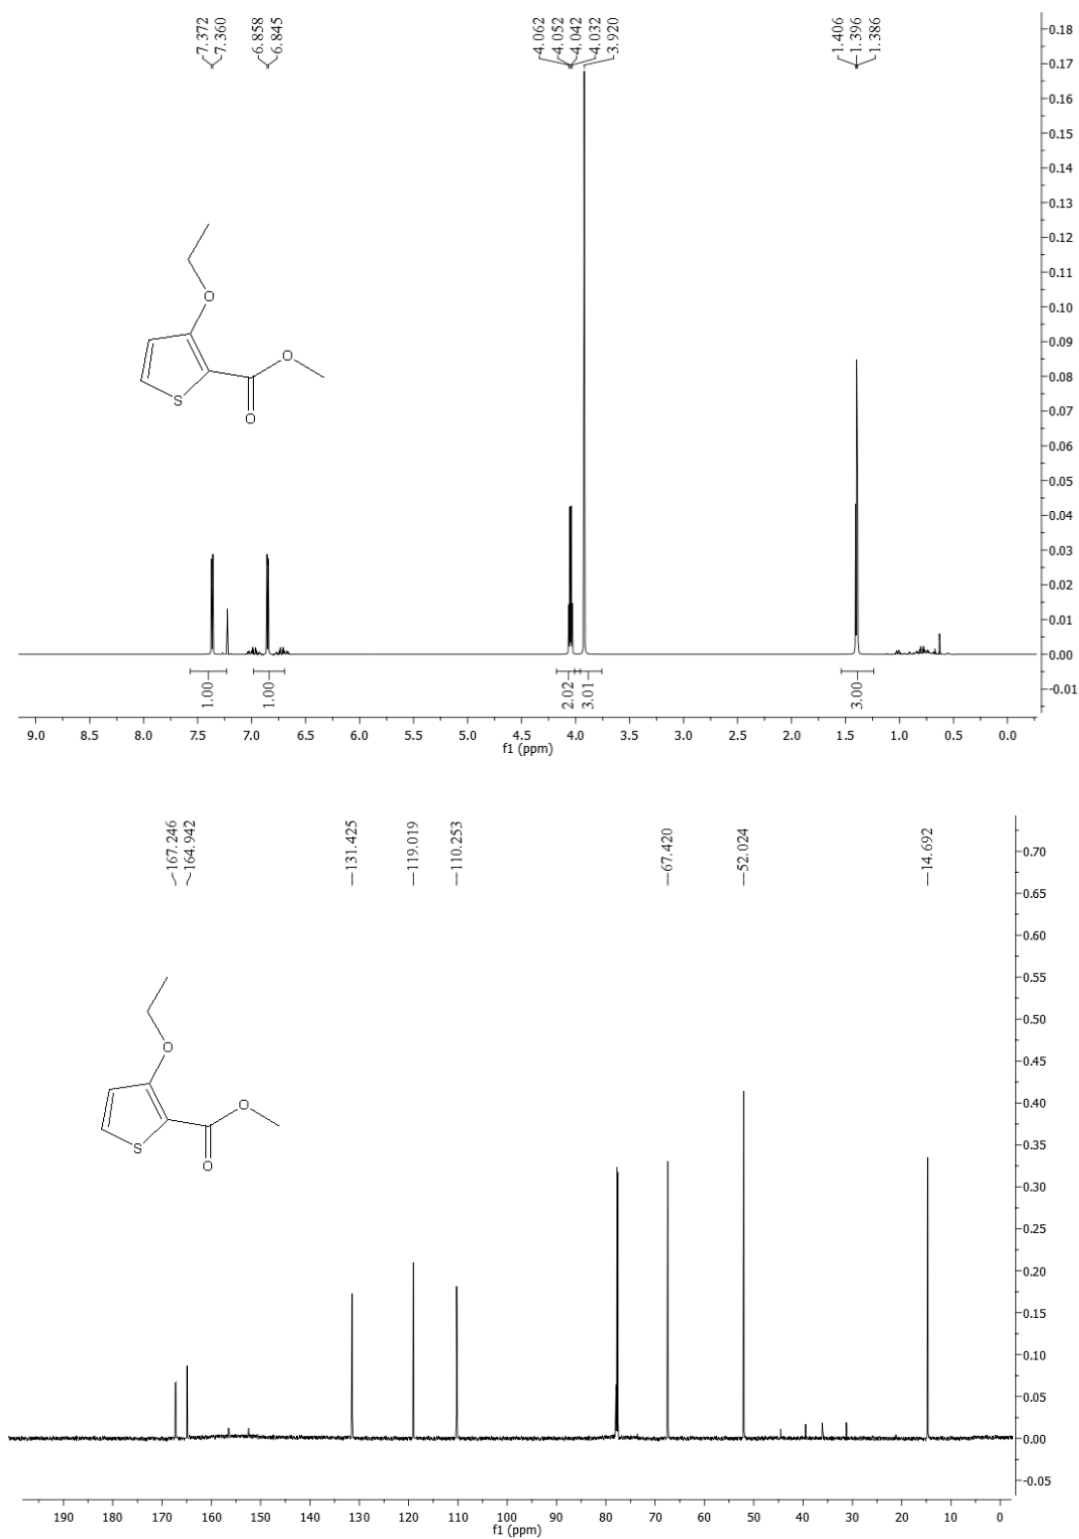

Figure S15. NMR spectra of Methyl 3-ethoxythiophene-2-carboxylate (7e).

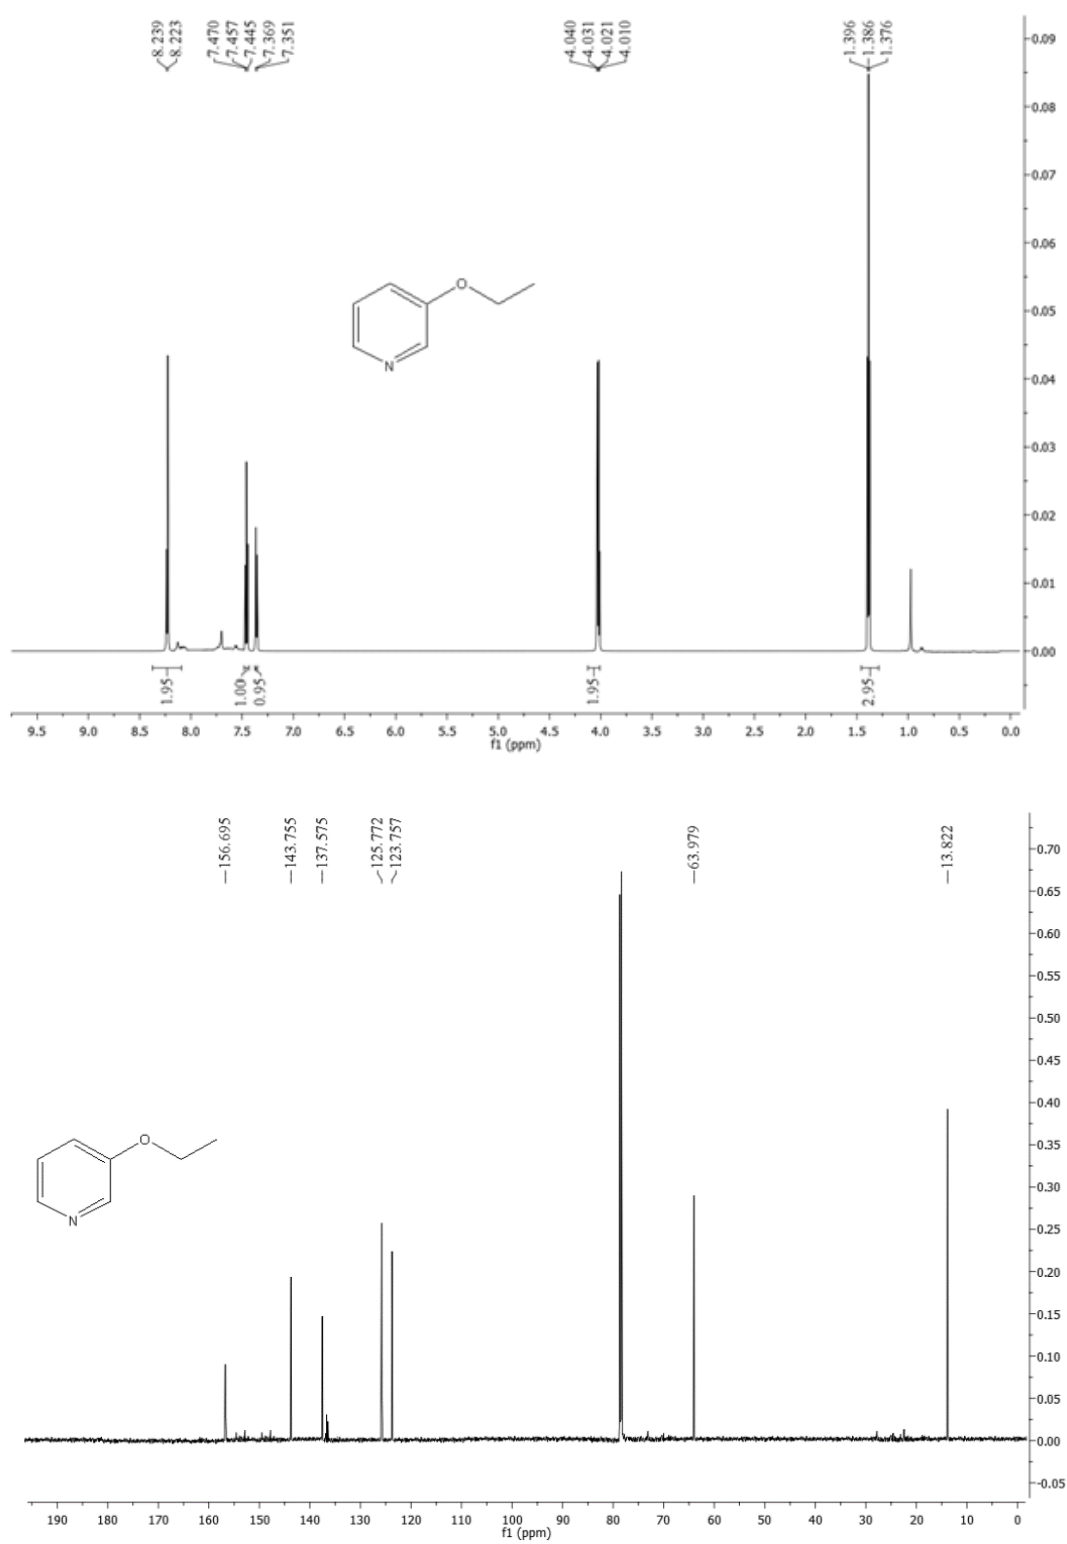

Figure S16. NMR spectra of 3-Ethoxypyridine (7f).

## Physical and NMR data of thioethers 8

***n*-Butyl 4-nitrophenyl sulfide (8a):** 273 mg (65% yield). Yellow oil.  $^1\text{H}$  NMR ( $\text{CDCl}_3$ , 600 MHz): 8.10 (d, 2H,  $J = 7.8$  Hz), 7.47 (d, 2H,  $J = 7.8$  Hz), 2.87 (t, 2H,  $J = 7.8$  Hz), 1.71–1.65 (m, 2H), 1.41–1.35 (m, 2H), 0.98 (t, 3H,  $J = 6.6$  Hz).  $^{13}\text{C}$  NMR ( $\text{CDCl}_3$ , 150 MHz): 146.7, 145.5, 127.0, 125.5, 33.6, 30.7, 21.0, 14.0. MS:  $m/z$  211 ( $\text{M}^+$ ).

***n*-Butyl 4-tolyl sulfide (8b):** 174 mg (48% yield). Yellow oil.  $^1\text{H}$  NMR ( $\text{CDCl}_3$ , 600 MHz): 7.15 (d, 2H,  $J = 7.8$  Hz), 7.04 (d, 2H,  $J = 7.8$  Hz), 2.89 (t, 2H,  $J = 7.8$  Hz), 2.31 (s, 3H), 1.71–1.68 (m, 2H), 1.39–1.37 (m, 2H), 0.99 (t, 3H,  $J = 6.6$  Hz).  $^{13}\text{C}$  NMR ( $\text{CDCl}_3$ , 150 MHz): 150.9, 141.3, 115.1, 113.4, 56.0, 44.5, 31.6, 29.4, 27.7, 22.9, 14.0. MS:  $m/z$  180 ( $\text{M}^+$ ).

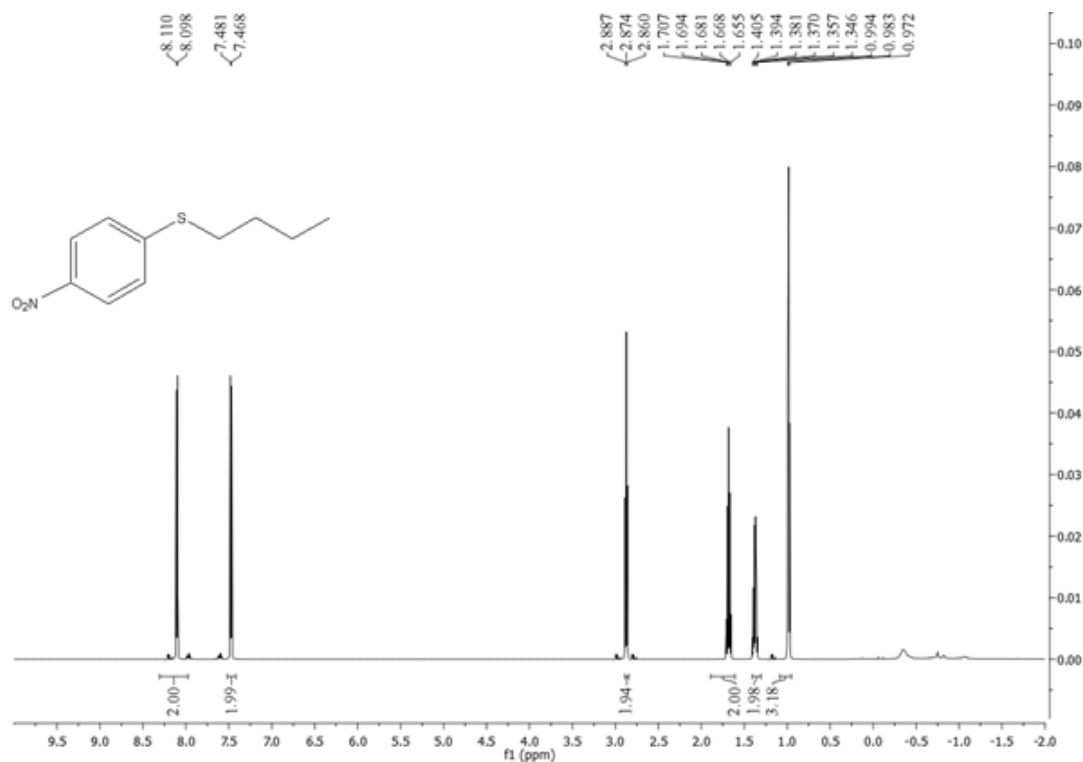

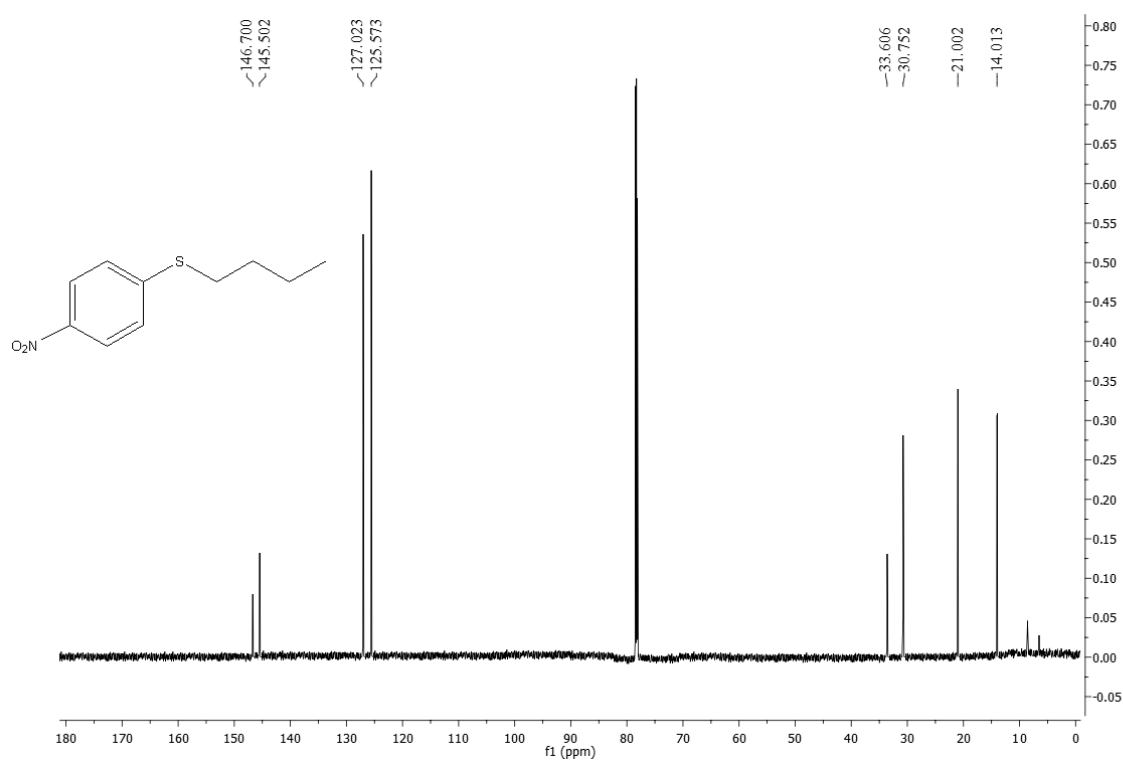Figure S17. *n*-Butyl 4-nitrophenyl sulfide (8a).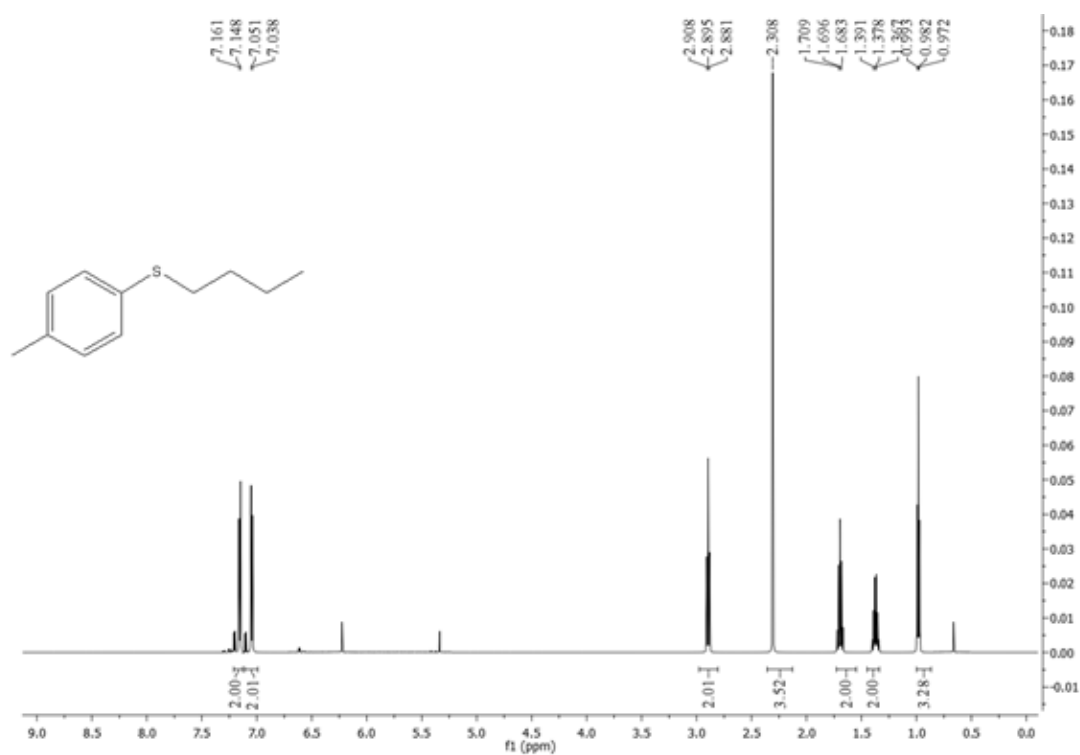

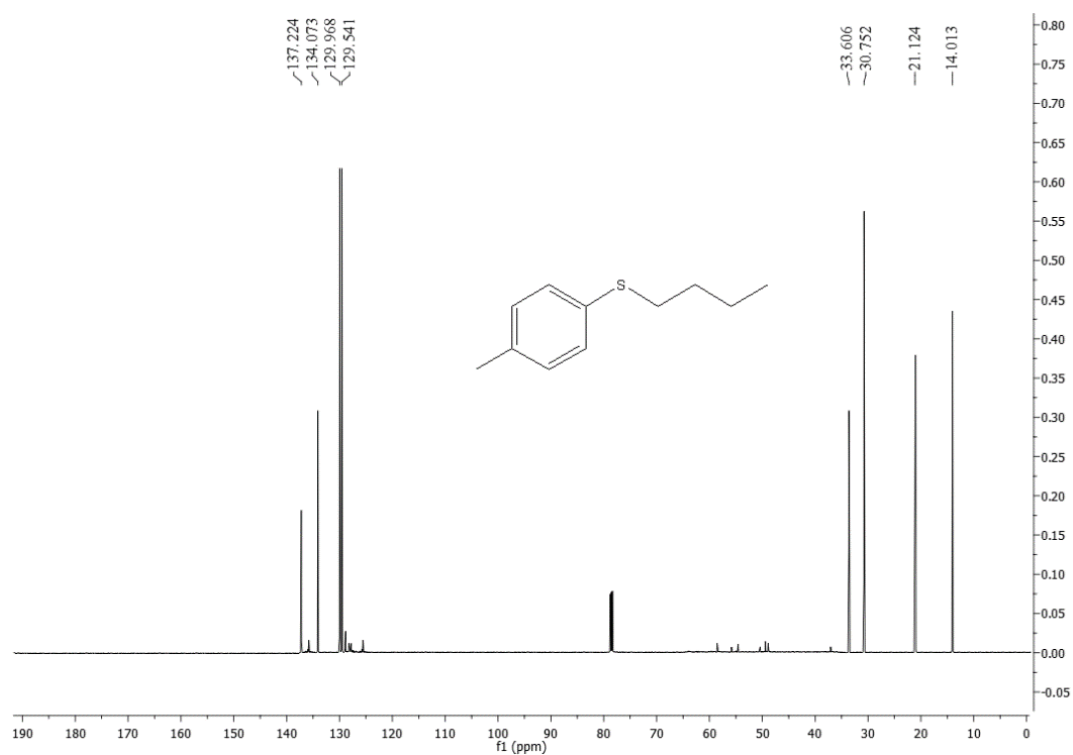

Figure S18. *n*-Butyl 4-tolyl sulfide (8b).
